# Supplementary material for: FOXO1-regulated lncRNA CYP1B1-AS1 suppresses breast cancer cell proliferation by inhibiting neddylation
Source: PubMed Central journal article supplement (PMC10505597; doi:10.1007/s10549-023-07090-z), 2023-08-28
Supplement: 10549_2023_7090_MOESM1_ESM.pdf [file 10549_2023_7090_MOESM1_ESM.pdf]

## Supplementary Table 1:

### Primer sequences used in qPCR.

| Primer             | Sequence (5' to 3')       |
|--------------------|---------------------------|
| CYP1B1-AS1 Forward | ACACAAGAATCGGCACTGGT      |
| CYP1B1-AS1 Reverse | GCCGCATGTTTCATCTGCAT      |
| FOXO1 Forward      | CCGGAGTTTAGCCAGTCCAA      |
| FOXO1 Reverse      | CACGCTCTTGACCATCCACT      |
| NAE1 Forward       | GGCCAAAGAGGGTCAAGGAA      |
| NAE1 Reverse       | AAATGGACTCTGGTGCCTGG      |
| U6 Forward         | CTCGCTTCGGCAGCACA         |
| U6 Reverse         | AACGCTTCACGAATTTGCGT      |
| GAPDH Forward      | CCGGGAAACTGTGGCGTGATGG    |
| GAPDH Reverse      | AGGTGGAGGAGTGGGTGTCGCTGTT |

## Supplementary Table 2:

### CYP1B1-AS1 probe sequence used in FISH experiment.

---

| Name         | Sequence (5'-3')                       |
|--------------|----------------------------------------|
| NR-027252.1: | TGTTTCCTAGTTAGTCGCTTGAACTTCCAATGCCCTAT |

---

### Supplementary Table 3:

#### SiRNAs and negative control.

| Name             | Sequence (5' to 3')   |
|------------------|-----------------------|
| FOXO1 siRNA1     | CGGGCUGGAAGAAUCAAUTT  |
| FOXO1 siRNA2     | CCCUCGAACUAGCUCAAUTT  |
| NAE1 siRNA       | GGGUUGUGCUUUAGUCUGUTT |
| Negative control | UUCUCCGAACGUGUCACGUTT |

## Supplementary Table 4:

### Primer sequences used in CHIP and dual-luciferase assay.

| Primer           | Sequence (5' to 3')       |
|------------------|---------------------------|
| Promoter Forward | GTGACATTATTTATGAACCTGCTGC |
| Promoter Reverse | TGGGTGCTTCCTGCTGTTG       |

## Supplementary Table 5:

### Primer sequences used in RNA pull-down experiment.

| Primer                       | Sequence (5' to 3')                                 |
|------------------------------|-----------------------------------------------------|
| CYP1B1-AS1 sense Forward     | taatacgaactcactatagggTGGTTGCTAACACAAGAATC<br>G      |
| CYP1B1-AS1 sense Reverse     | AGTGAGTTATGGTCACCTTGGAATGG                          |
| CYP1B1-AS1 antisense Forward | taatacgaactcactatagggAGTGAGTTATGGTCACCTTG<br>GAATGG |
| CYP1B1-AS1 antisense Reverse | TGGTTGCTAACACAAGAATCG                               |

## Supplementary Table 6:

The antibodies used in this study.

| Antibody        | Specificity                | Manufacturer | Code     |
|-----------------|----------------------------|--------------|----------|
| anti-FOXO1      | Rabbit monoclonal antibody | CST          | 2880     |
| anti-NAE1       | Rabbit monoclonal antibody | Abcam        | ab187142 |
| anti-p21        | Rabbit monoclonal antibody | Abcam        | Ab109520 |
| anti-cyclin D1  | Rabbit monoclonal antibody | Abcam        | ab40754  |
| anti-BCL2       | Rabbit monoclonal antibody | Abcam        | ab32124  |
| anti-BAX        | Rabbit monoclonal antibody | Abcam        | ab32503  |
| anti-NEDD8      | Rabbit monoclonal antibody | Abcam        | ab81264  |
| anti-UBA3       | Rabbit monoclonal antibody | Abcam        | ab124728 |
| anti-beta-actin | Rabbit polyclonal antibody | Abcam        | ab8227   |

Project: Alignment of Homo CYP1B1-AS1.sqd Contig 1

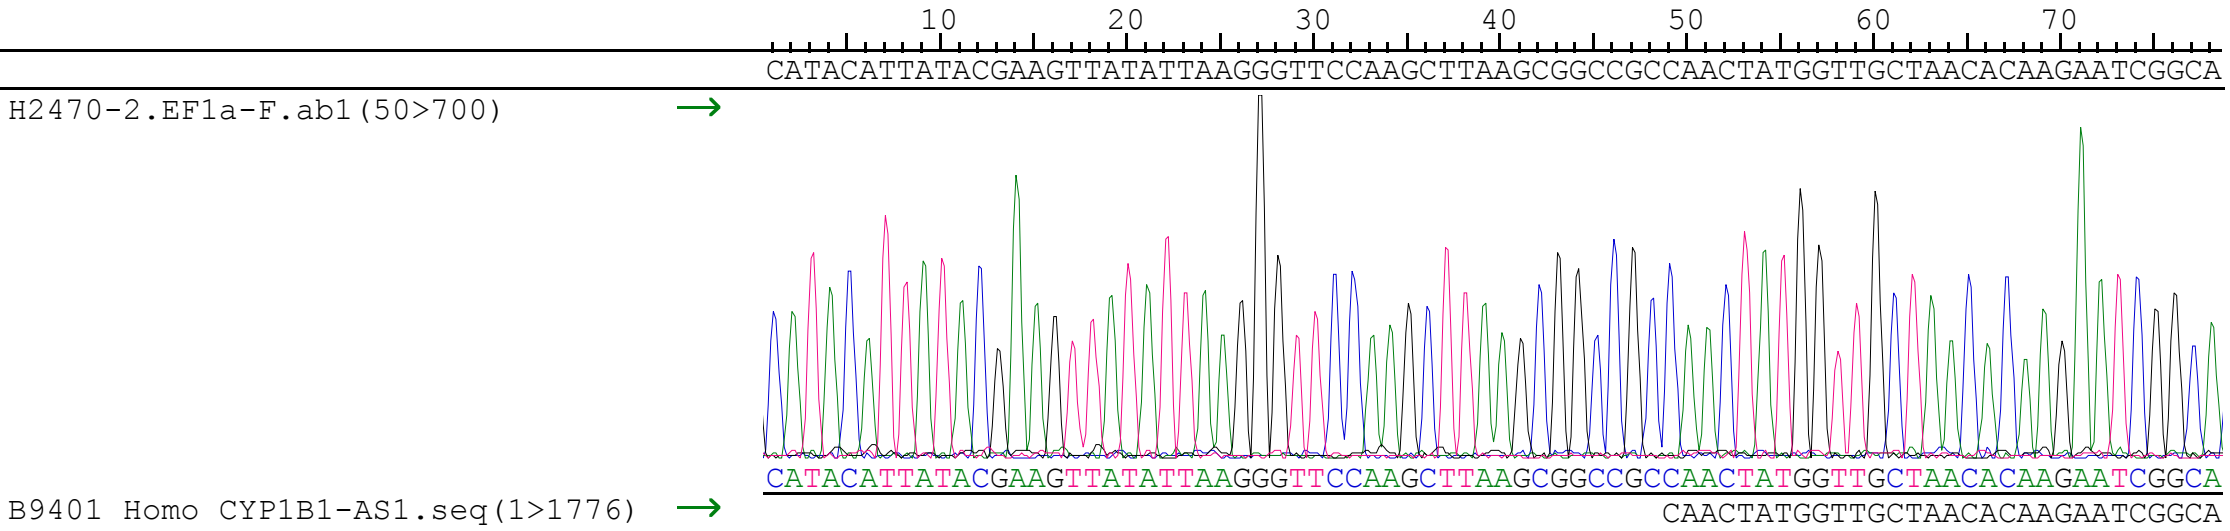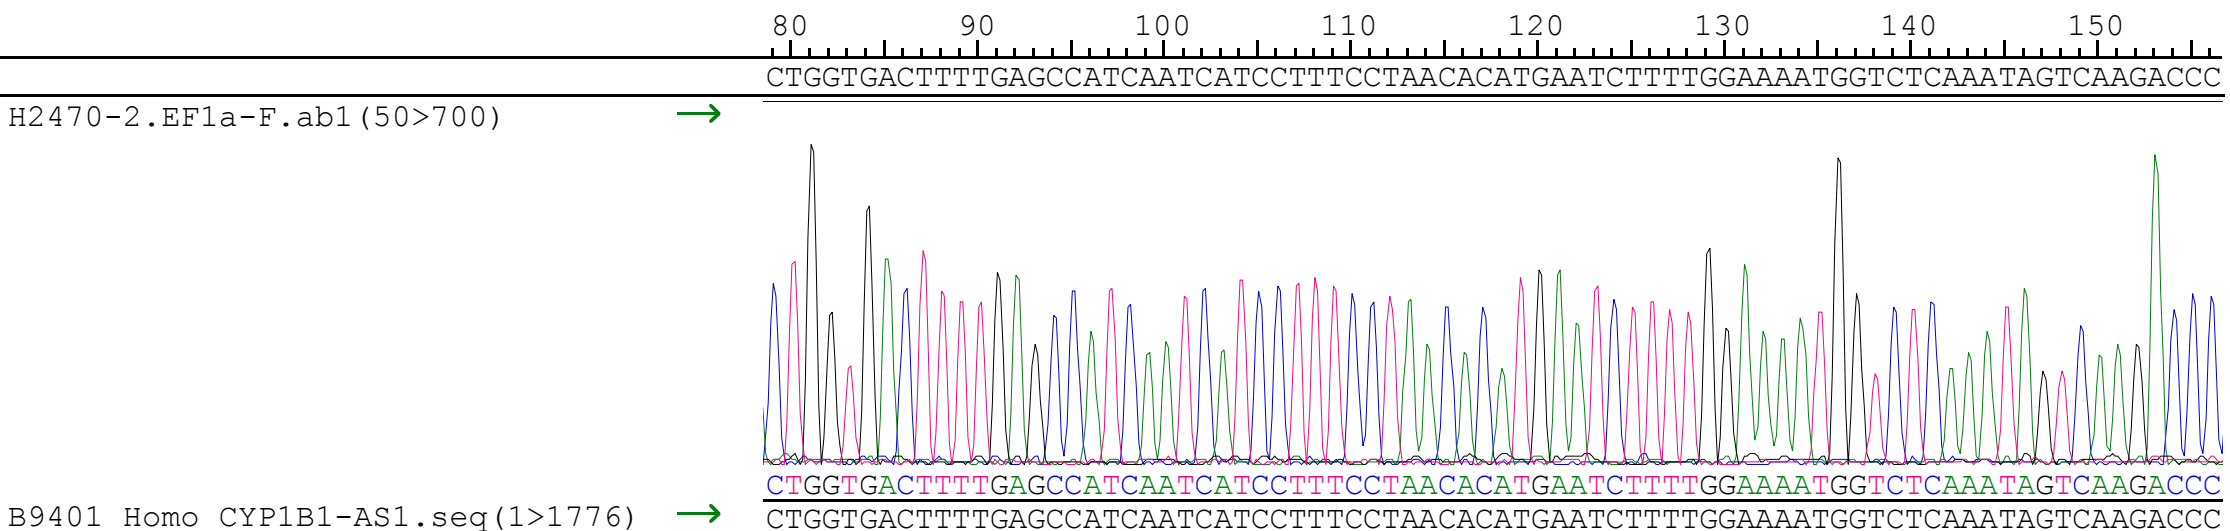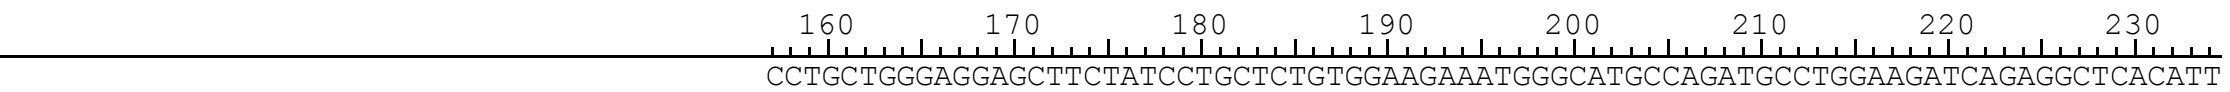

## Project: Alignment of Homo CYP1B1-AS1.sqd Contig 1

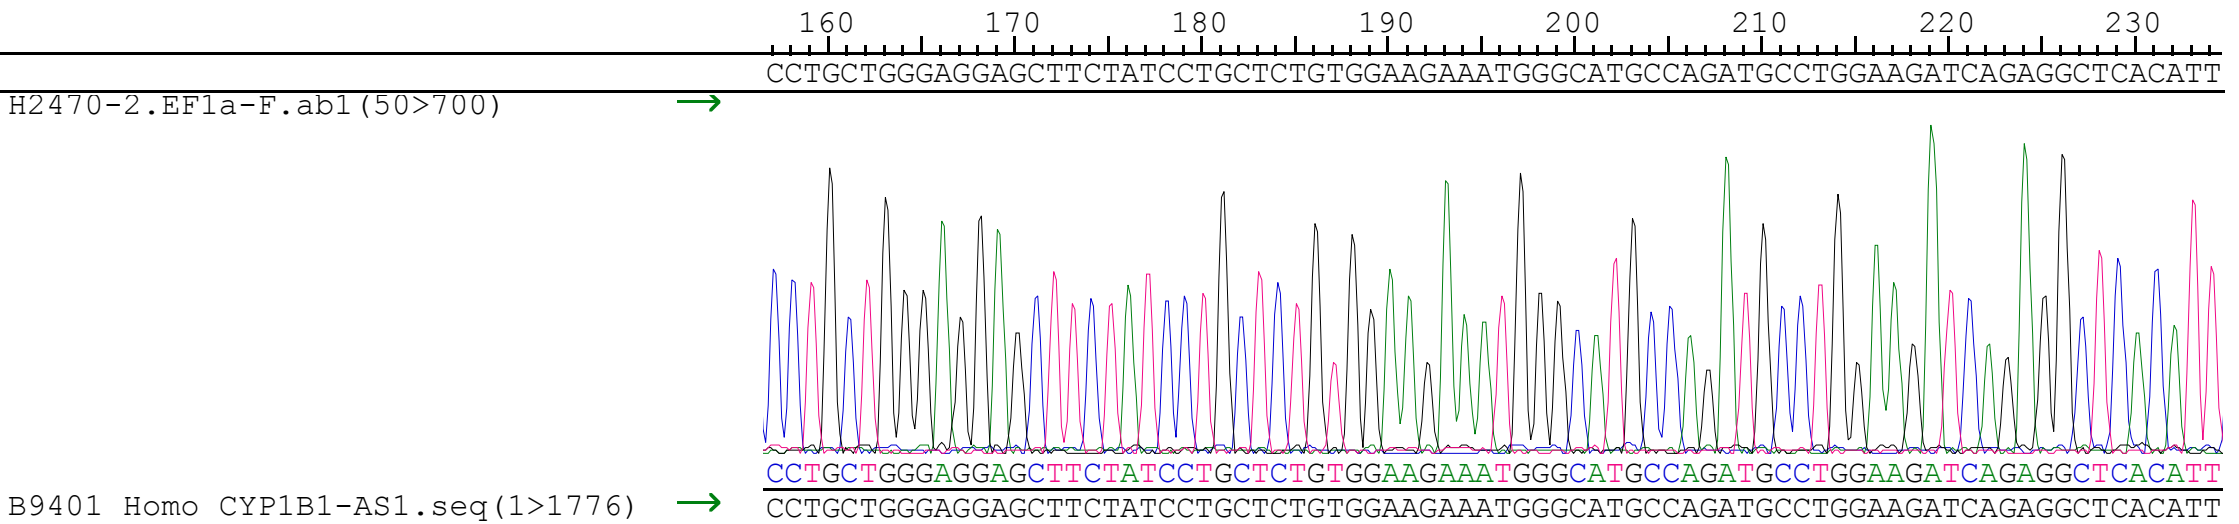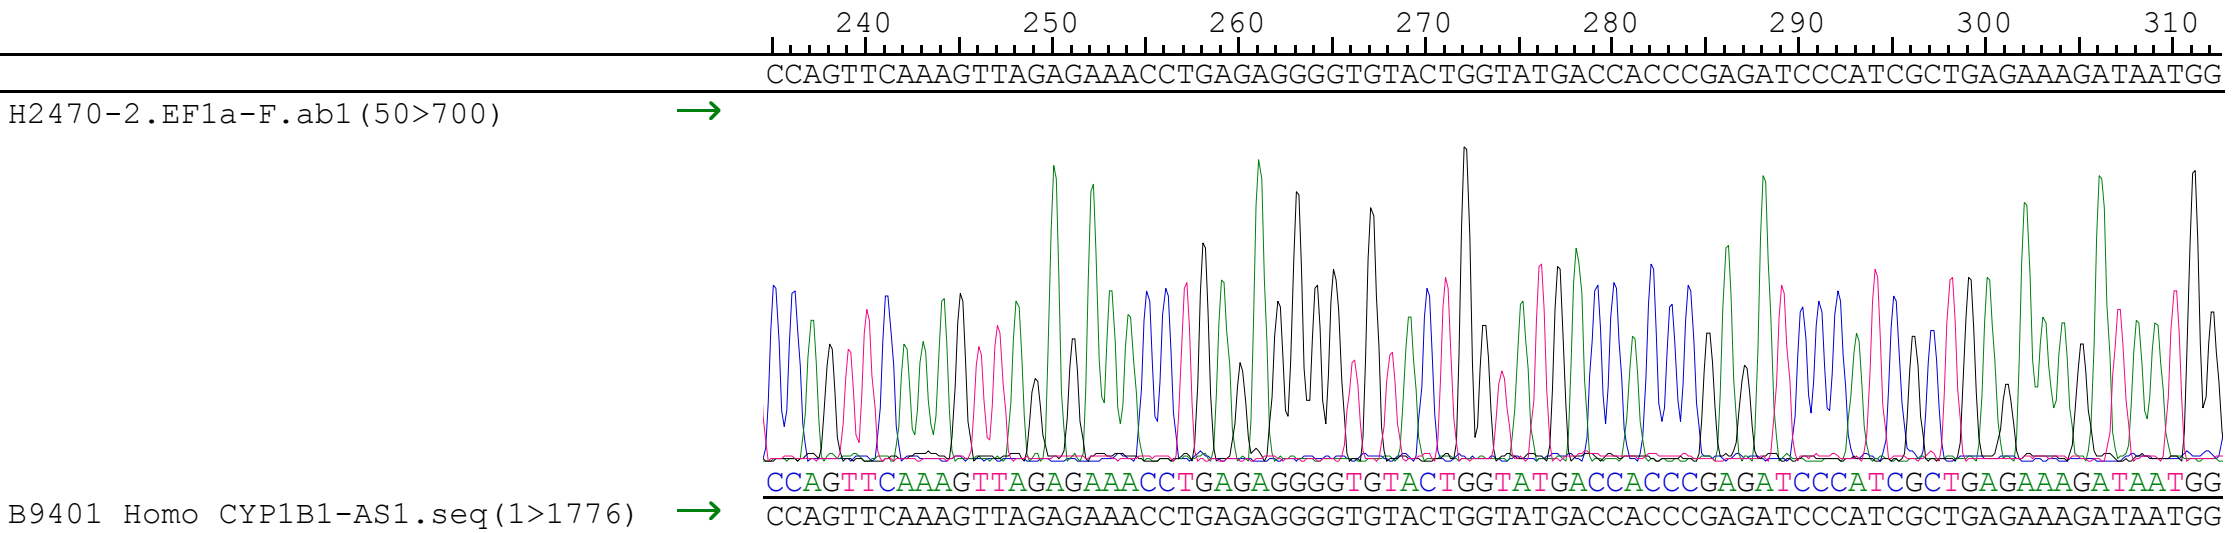

320 330 340 350 360 370 380 390

CCCTGGAGACAAAGACTGATGAAGAAAGACAGTATCCAGCTGTGATGCAGATGAAACATGCGGCATGGTTGCACTCAC



## Project: Alignment of Homo CYP1B1-AS1.sqd Contig 1

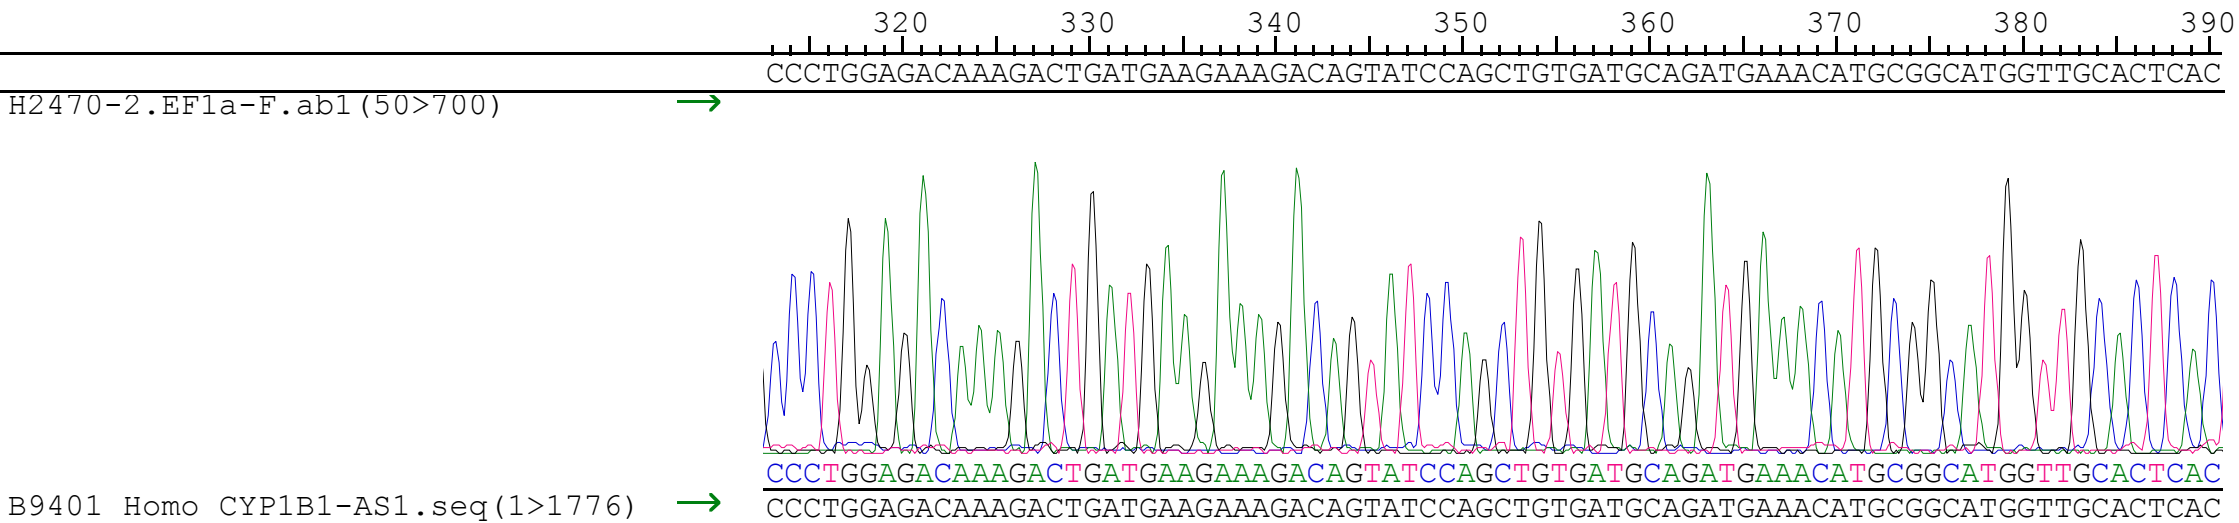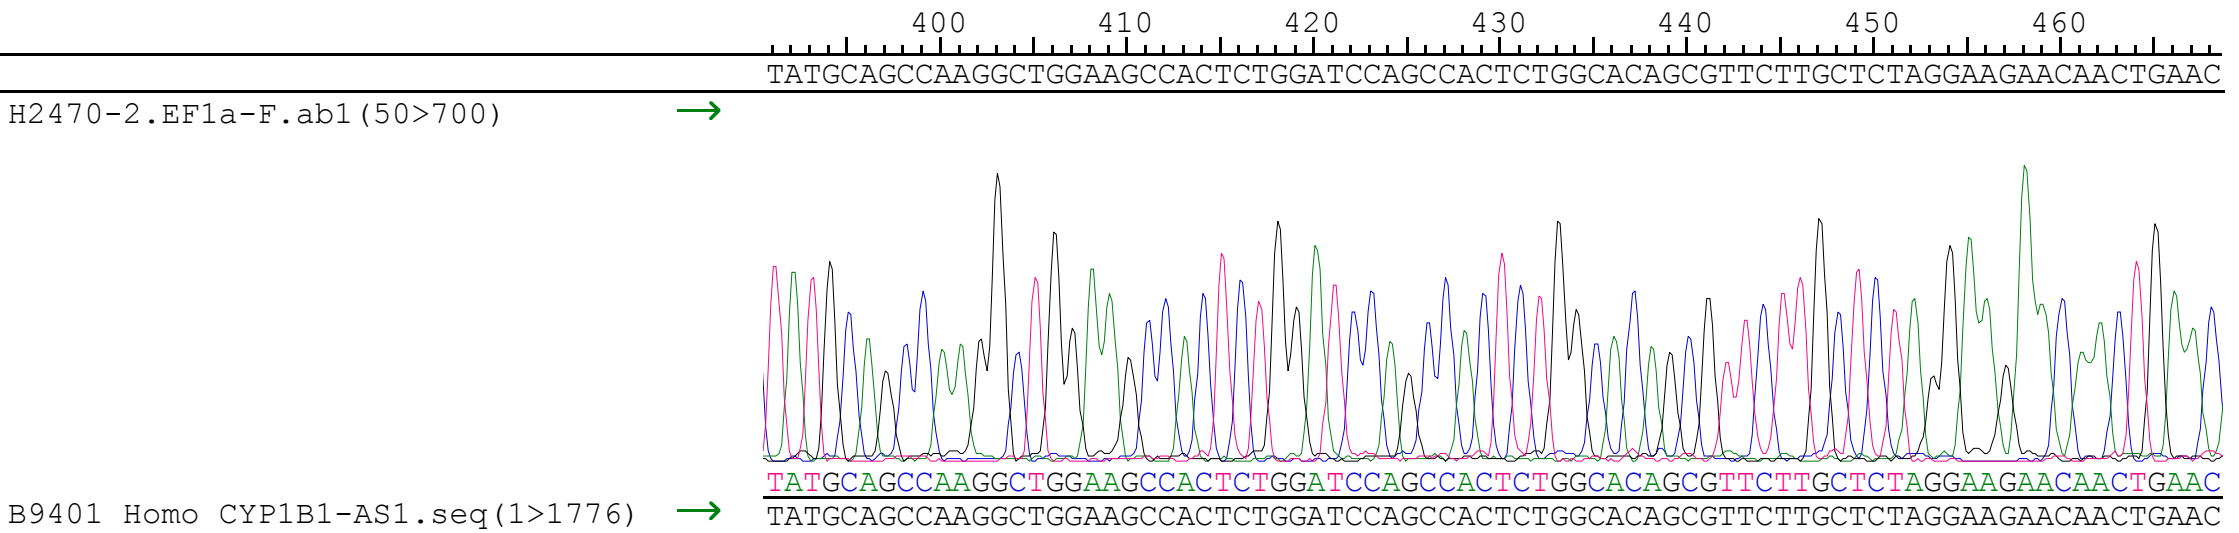

470 480 490 500 510 520 530 540

ATGGCCACACAGGCCTCACAGCTGGCATATGGAGGCTGTTAATAAGCTGAGCTTGAGGCTTCAAAGGACTCTTGTAGC

## Project: Alignment of Homo CYP1B1-AS1.sqd Contig 1

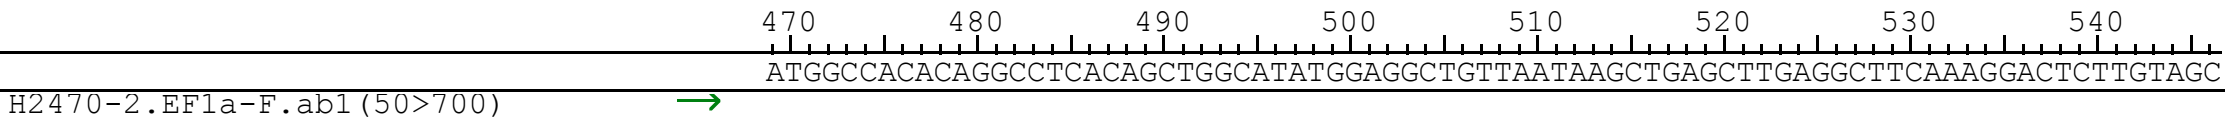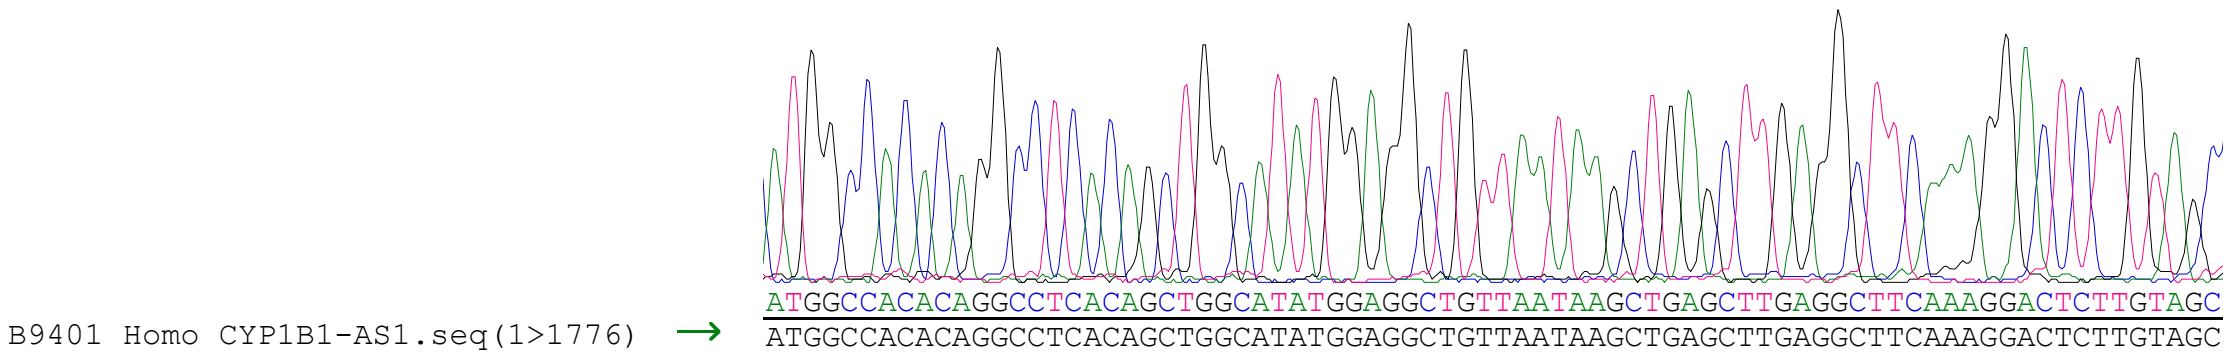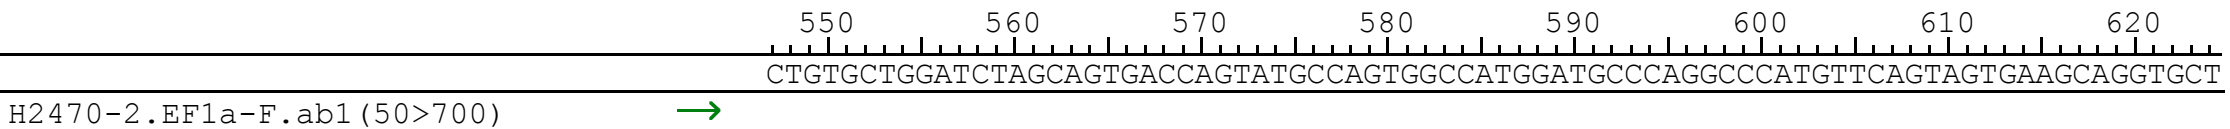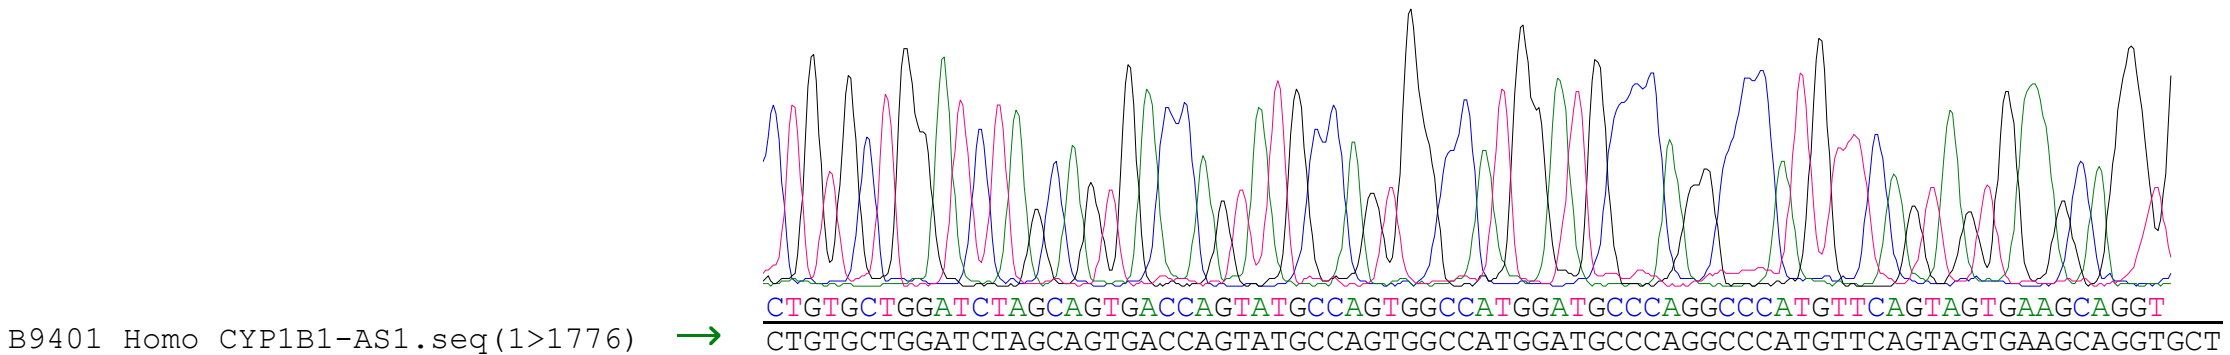

## Project: Alignment of Homo CYP1B1-AS1.sqd Contig 1

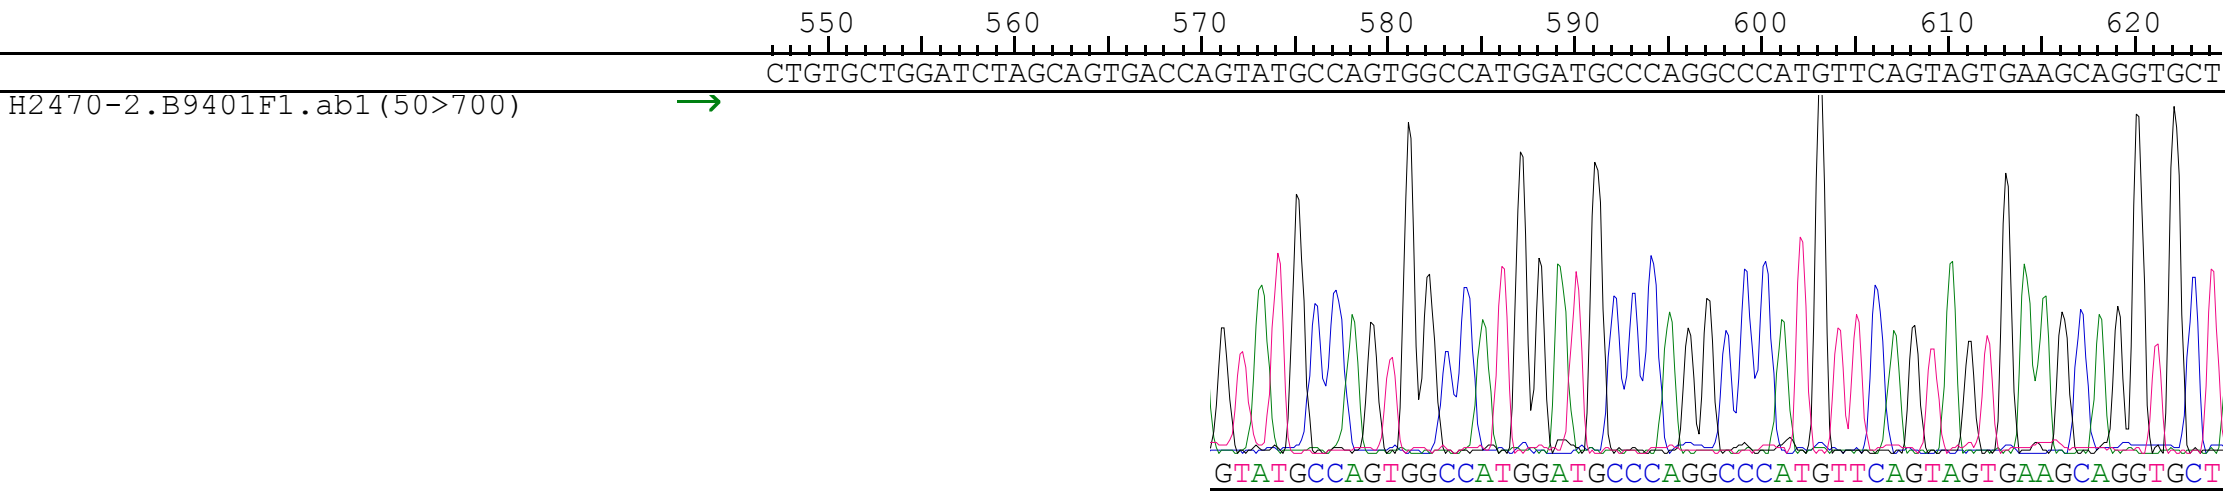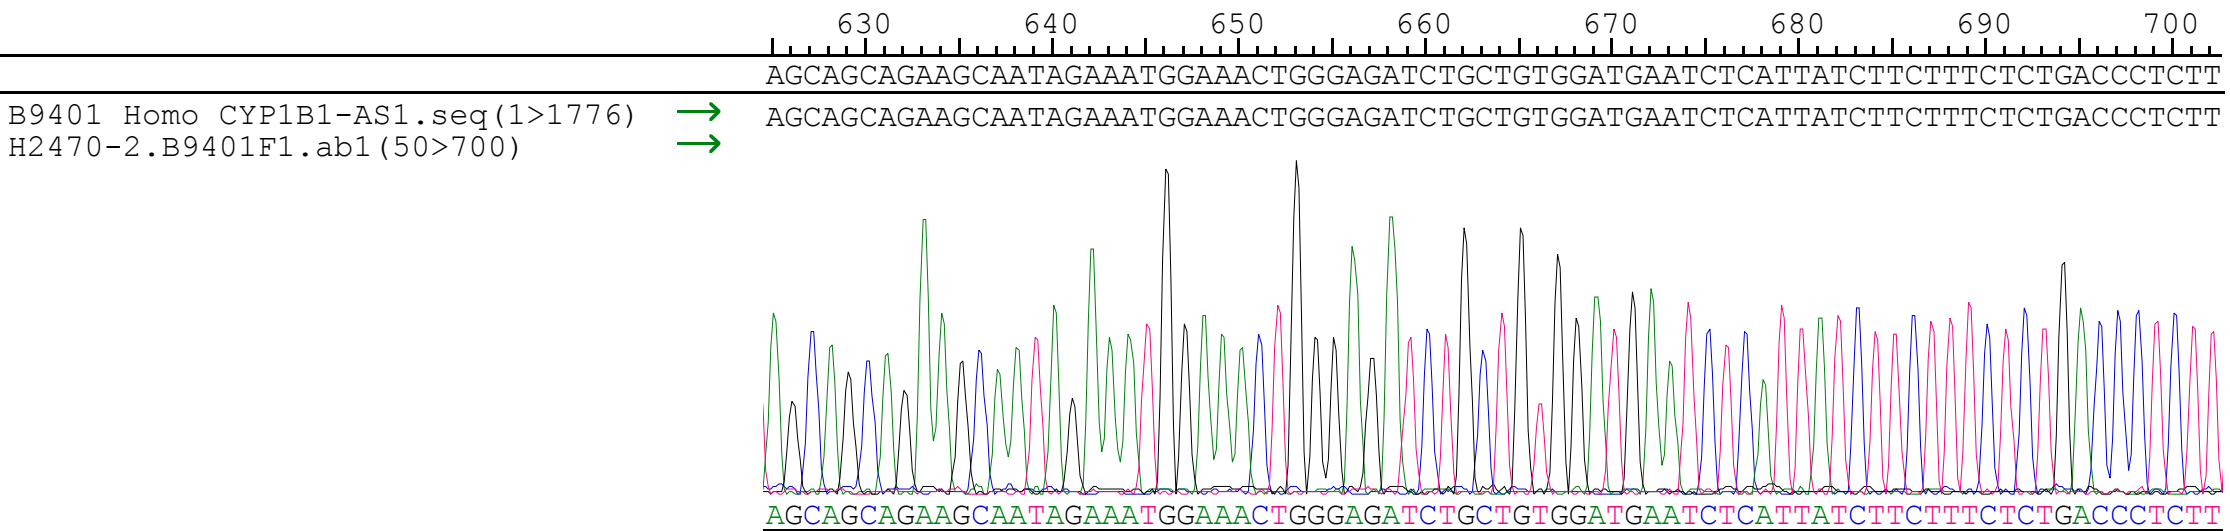

## Project: Alignment of Homo CYP1B1-AS1.sq Contig 1

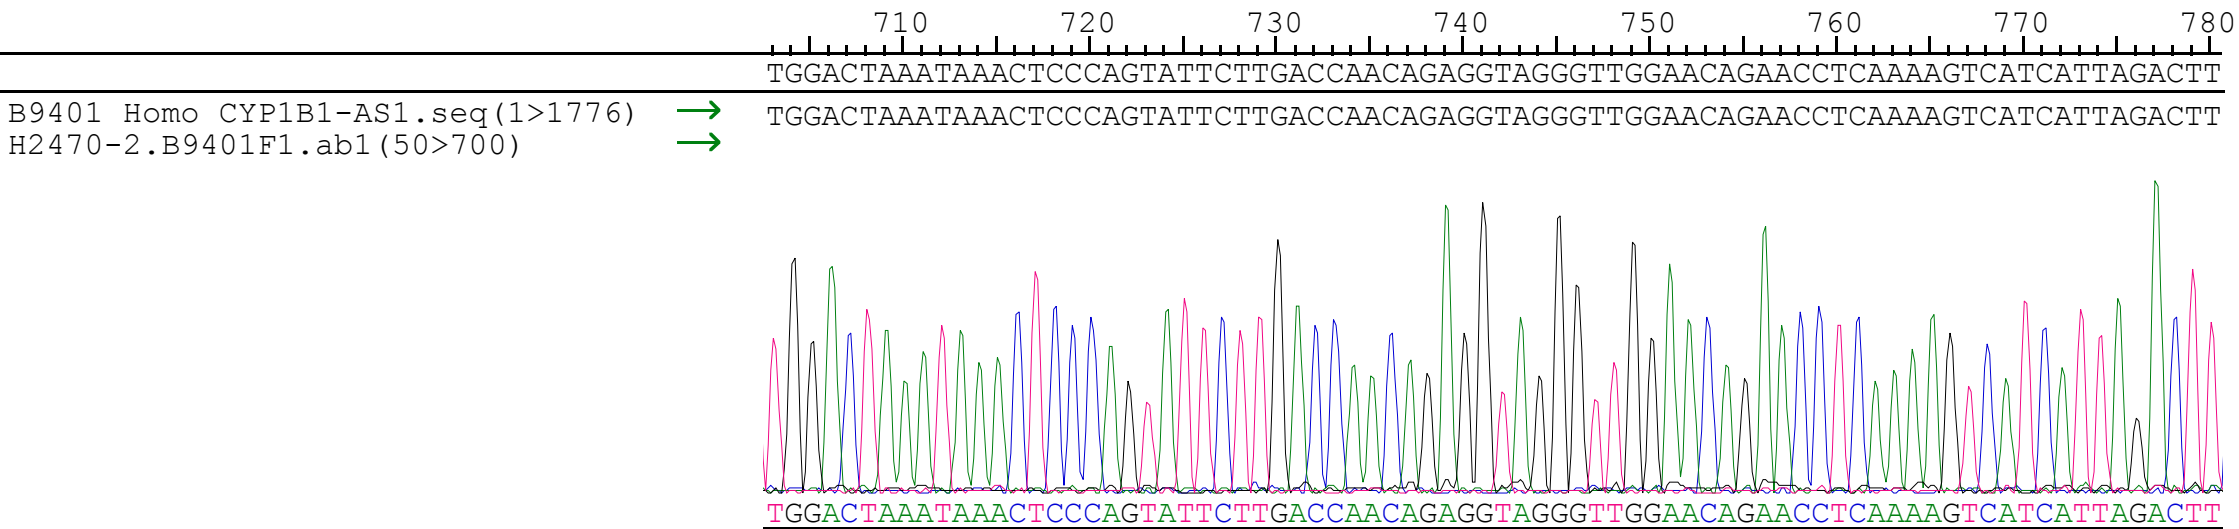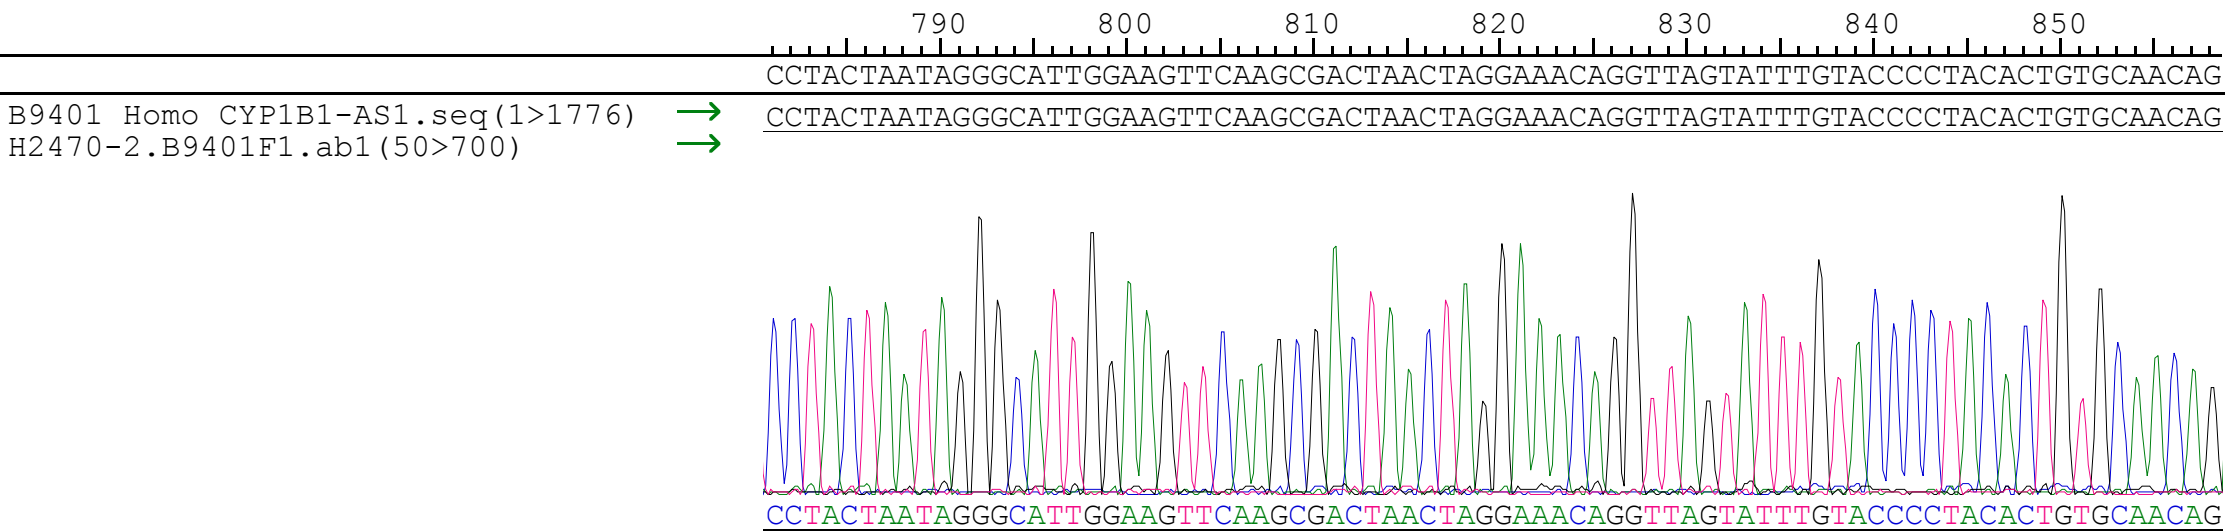

## Project: Alignment of Homo CYP1B1-AS1.sq Contig 1

860 870 880 890 900 910 920 930  
ATTACATACCATTGCTCTATTTGGCATCCTTTCCCTTAGGCTAGATTCCCAGAAGAAAGATTACTGATTTCGAAGGGCA  
B9401 Homo CYP1B1-AS1.seq (1>1776) → ATTACATACCATTGCTCTATTTGGCATCCTTTCCCTTAGGCTAGATTCCCAGAAGAAAGATTACTGATTTCGAAGGGCA  
H2470-2.B9401F1.ab1 (50>700) →

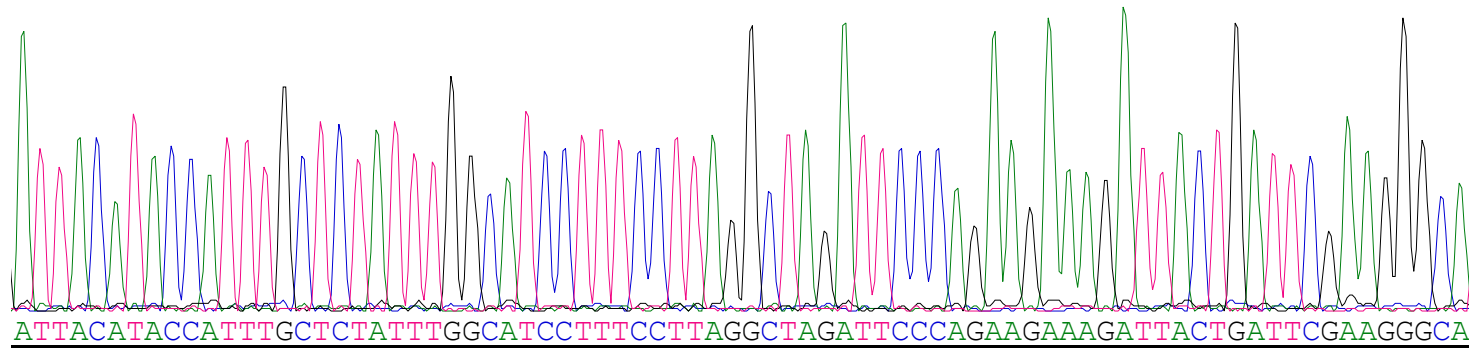

940 950 960 970 980 990 1000 1010  
TGAACATTTTTATGACTCTTGGCCTAAATTACTAGGCCAAGGTTTTTTCAAAGGGATGCACTAATTTTCACTATTTCC  
B9401 Homo CYP1B1-AS1.seq (1>1776) → TGAACATTTTTATGACTCTTGGCCTAAATTACTAGGCCAAGGTTTTTTCAAAGGGATGCACTAATTTTCACTATTTCC  
H2470-2.B9401F1.ab1 (50>700) →

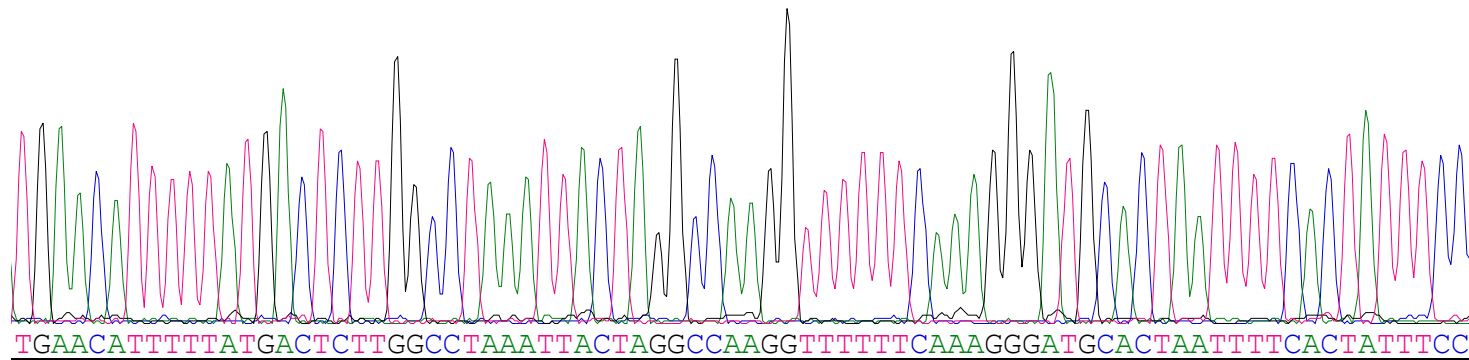

## Project: Alignment of Homo CYP1B1-AS1.sq Contig 1

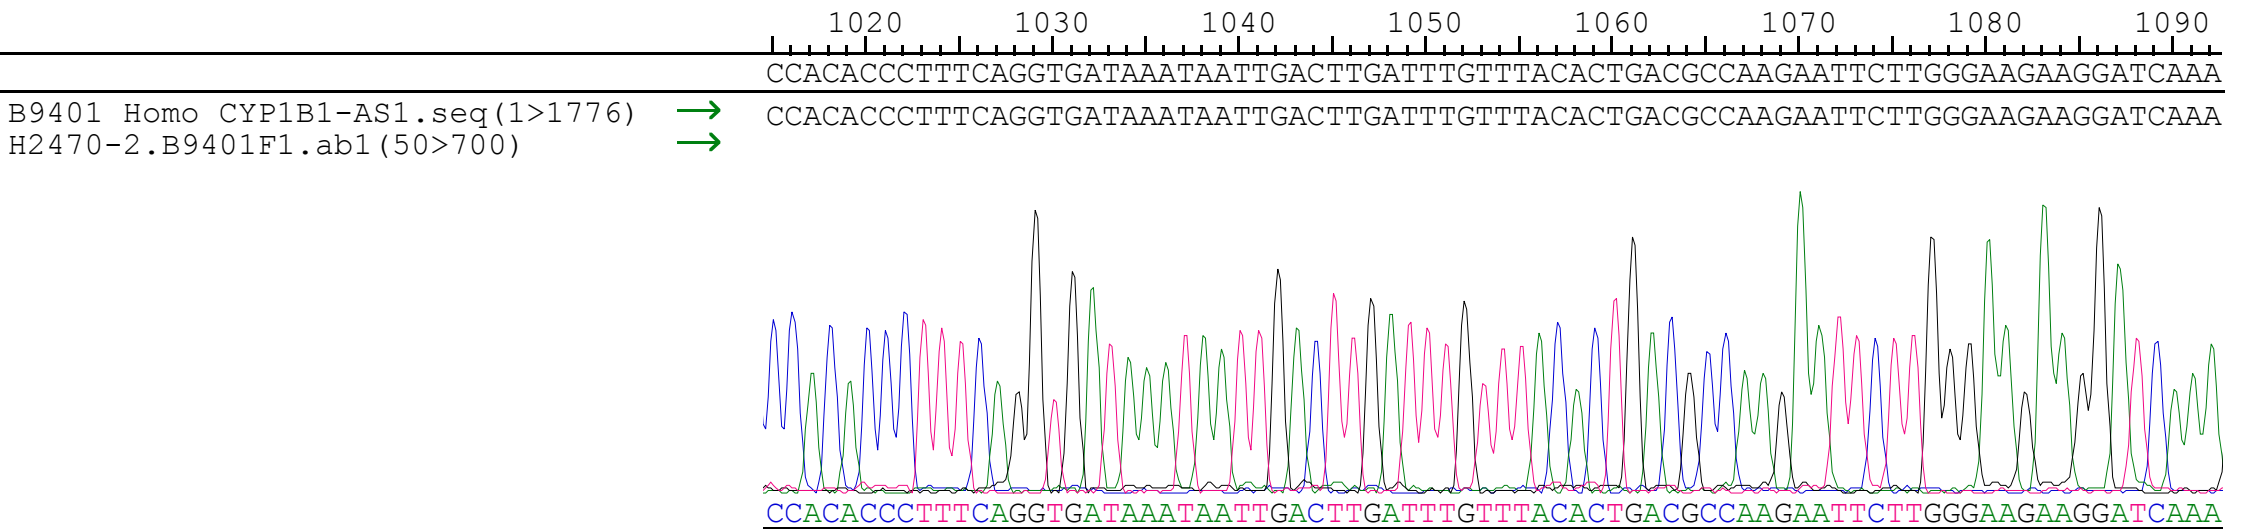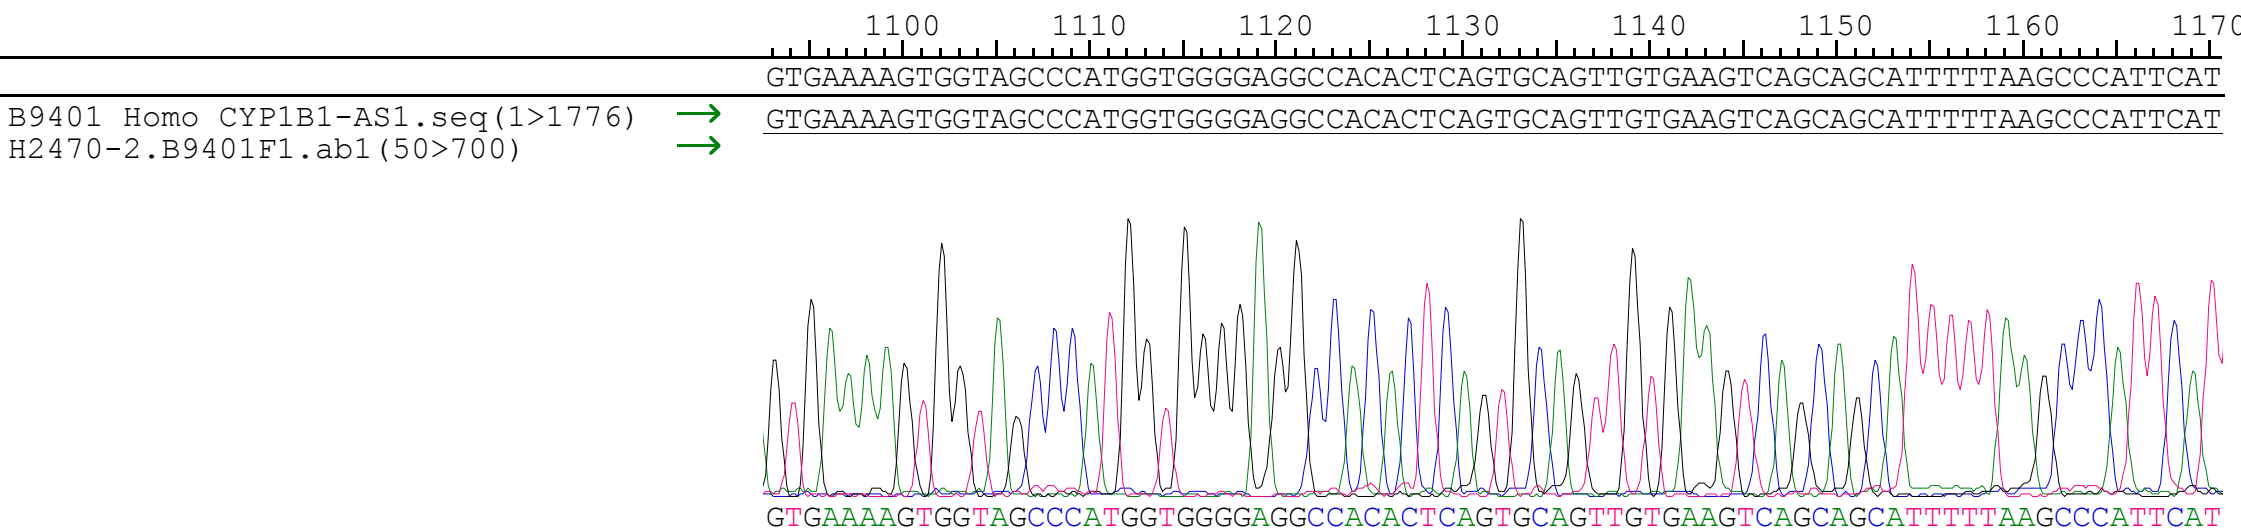

## Project: Alignment of Homo CYP1B1-AS1.sq Contig 1

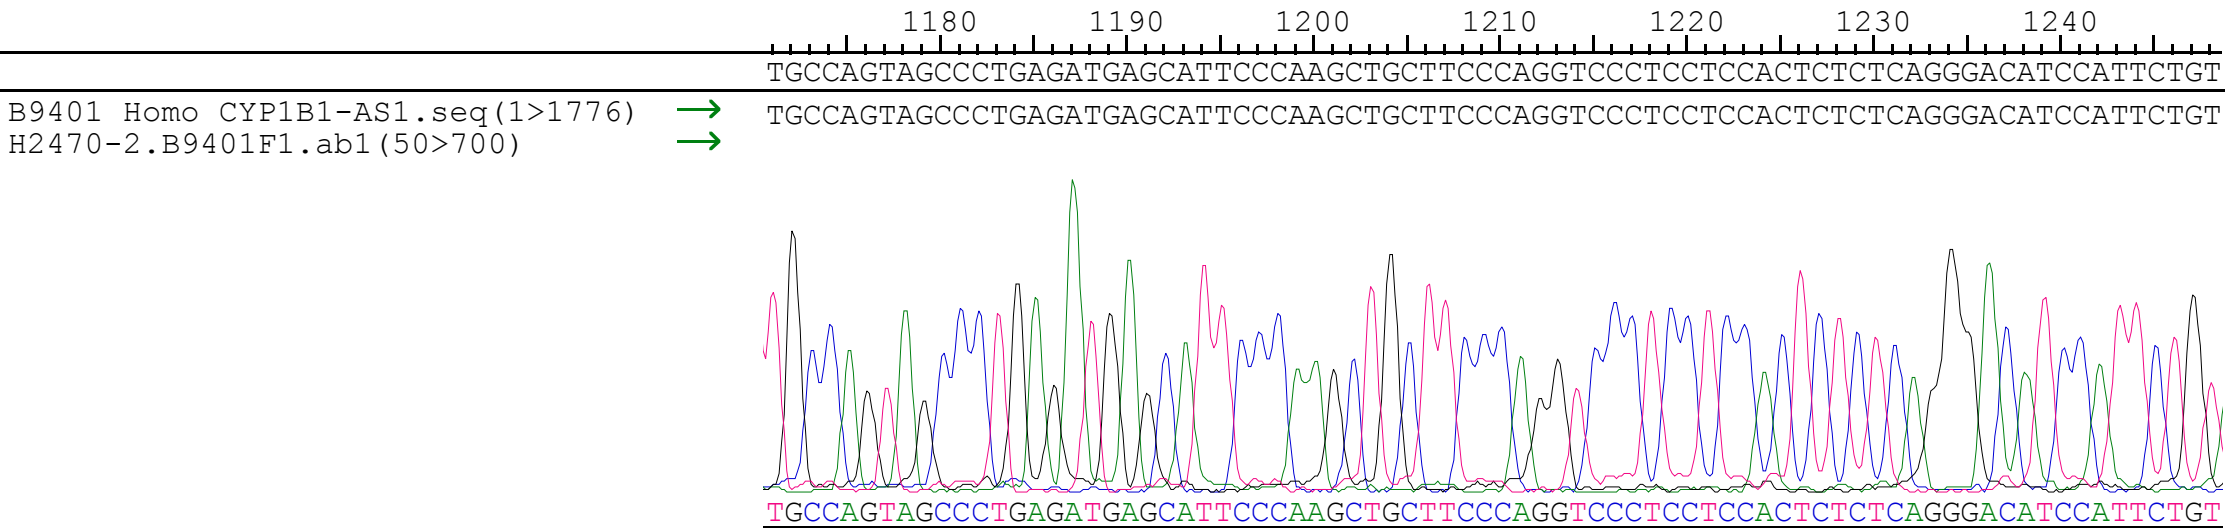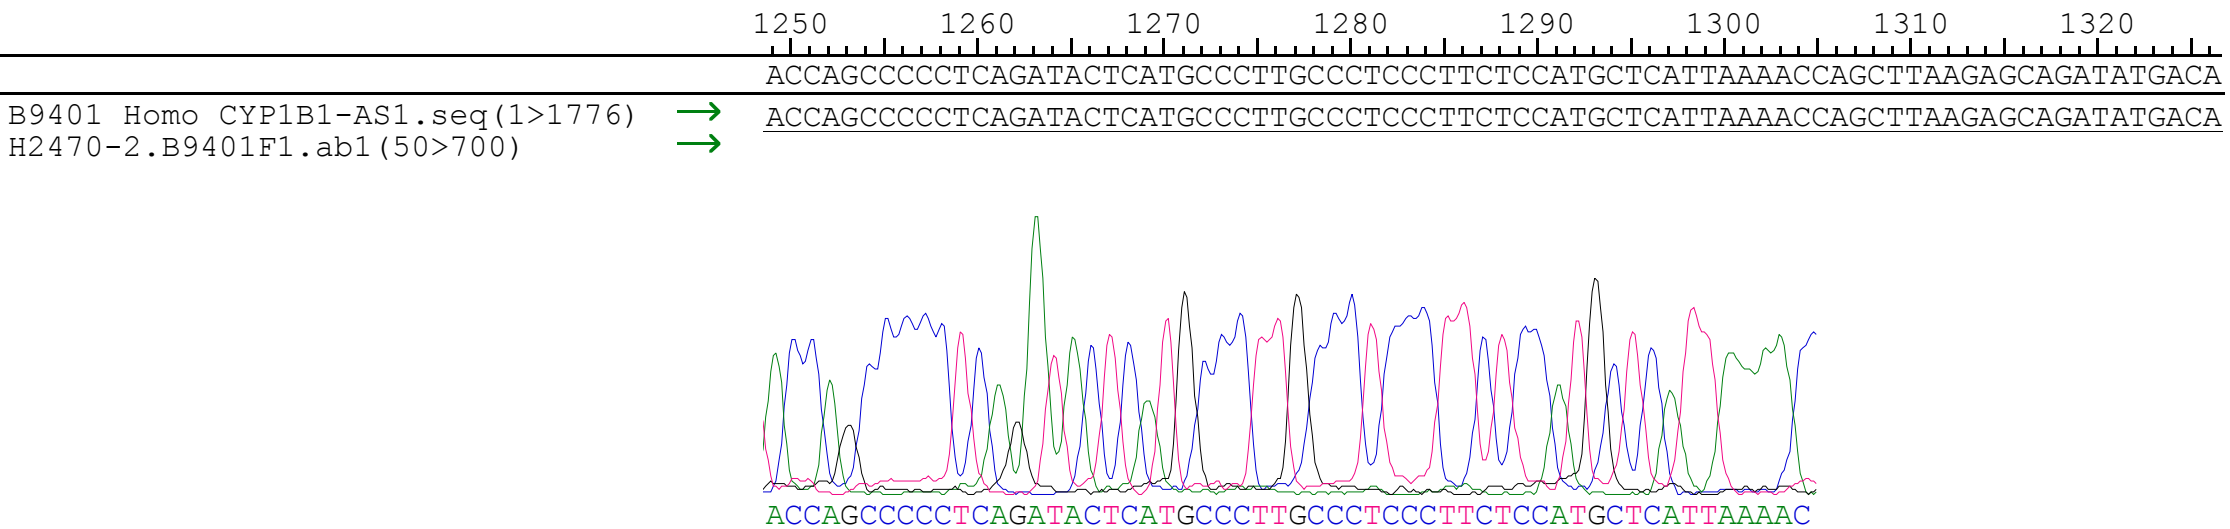

## Project: Alignment of Homo CYP1B1-AS1.sqd Contig 1

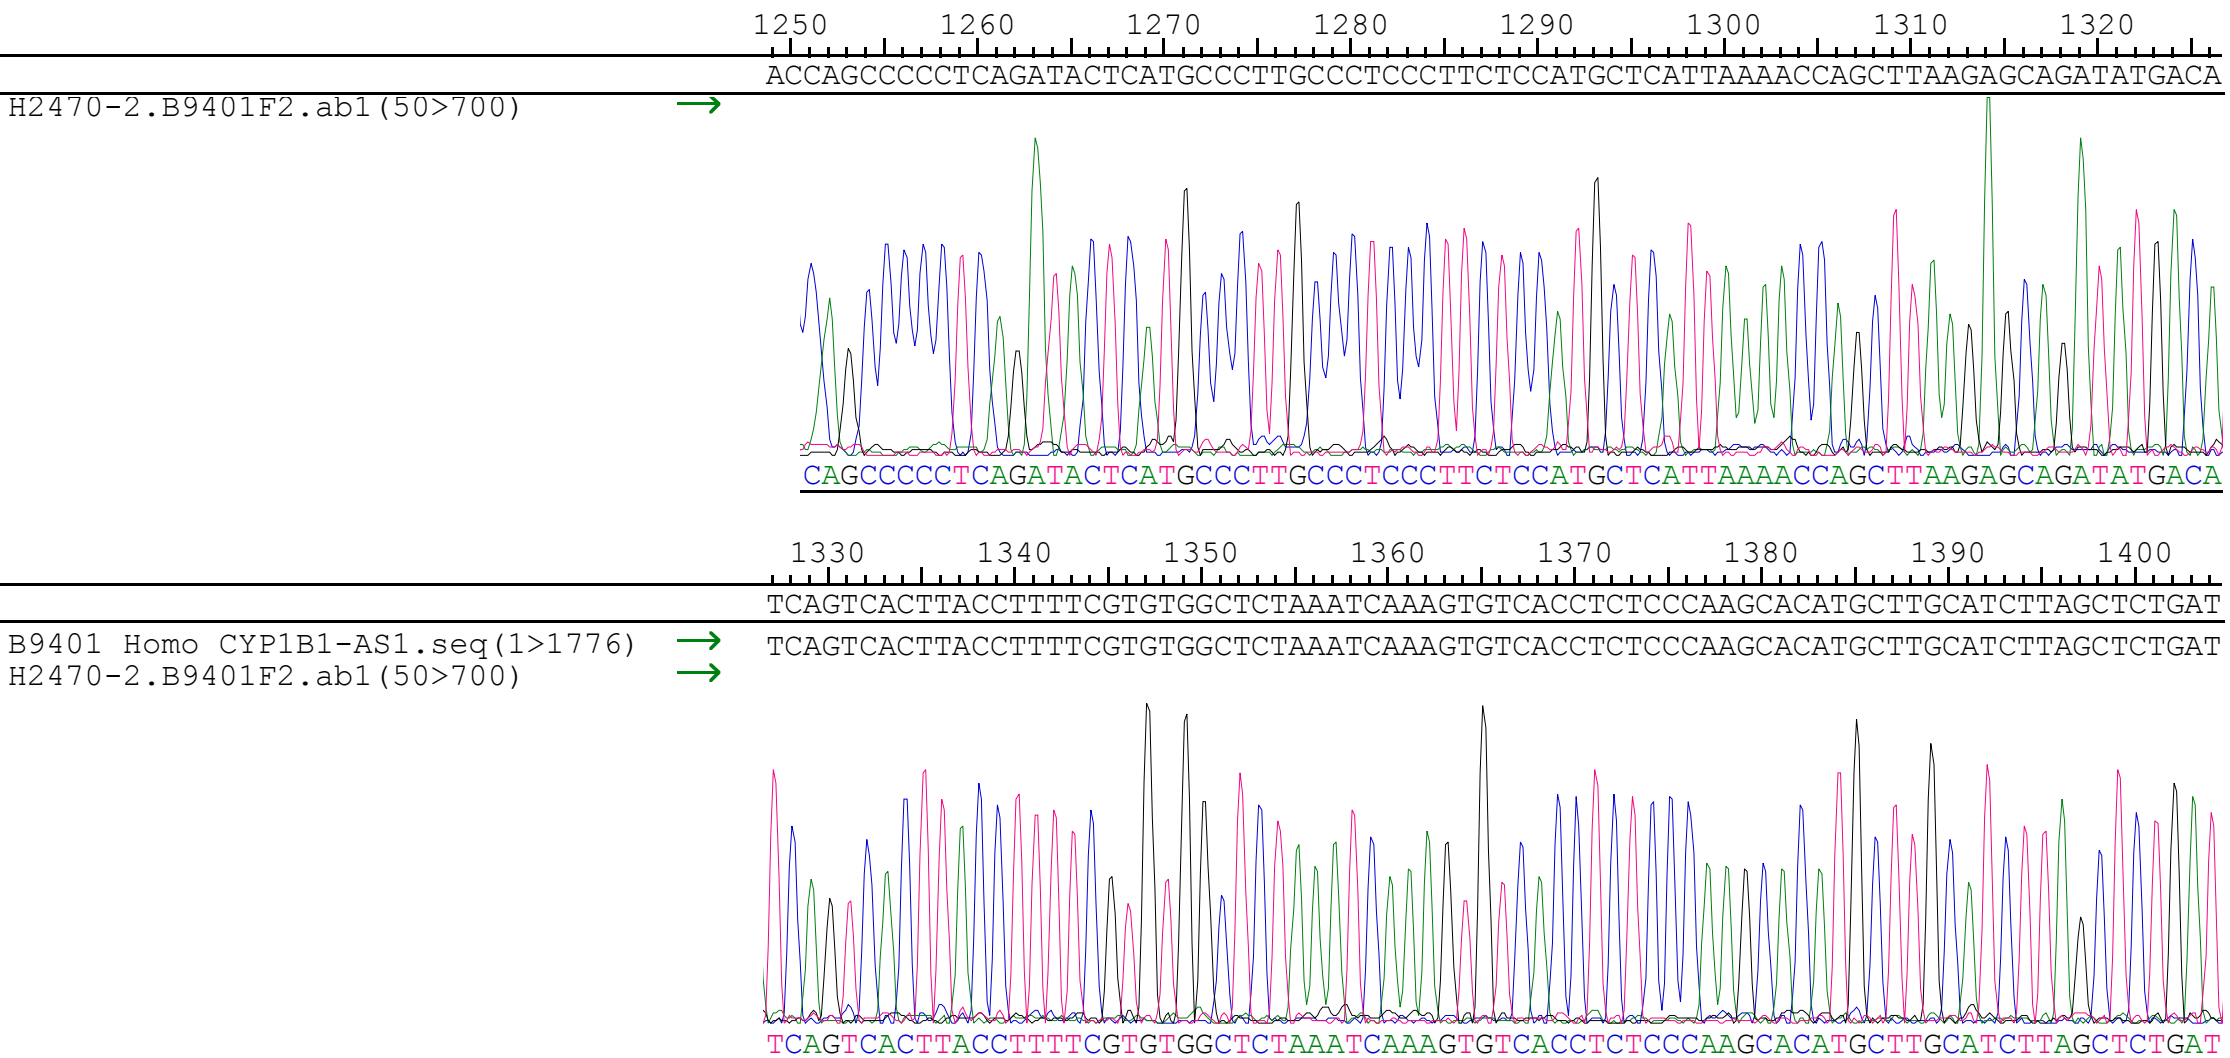



## Project: Alignment of Homo CYP1B1-AS1.sq Contig 1

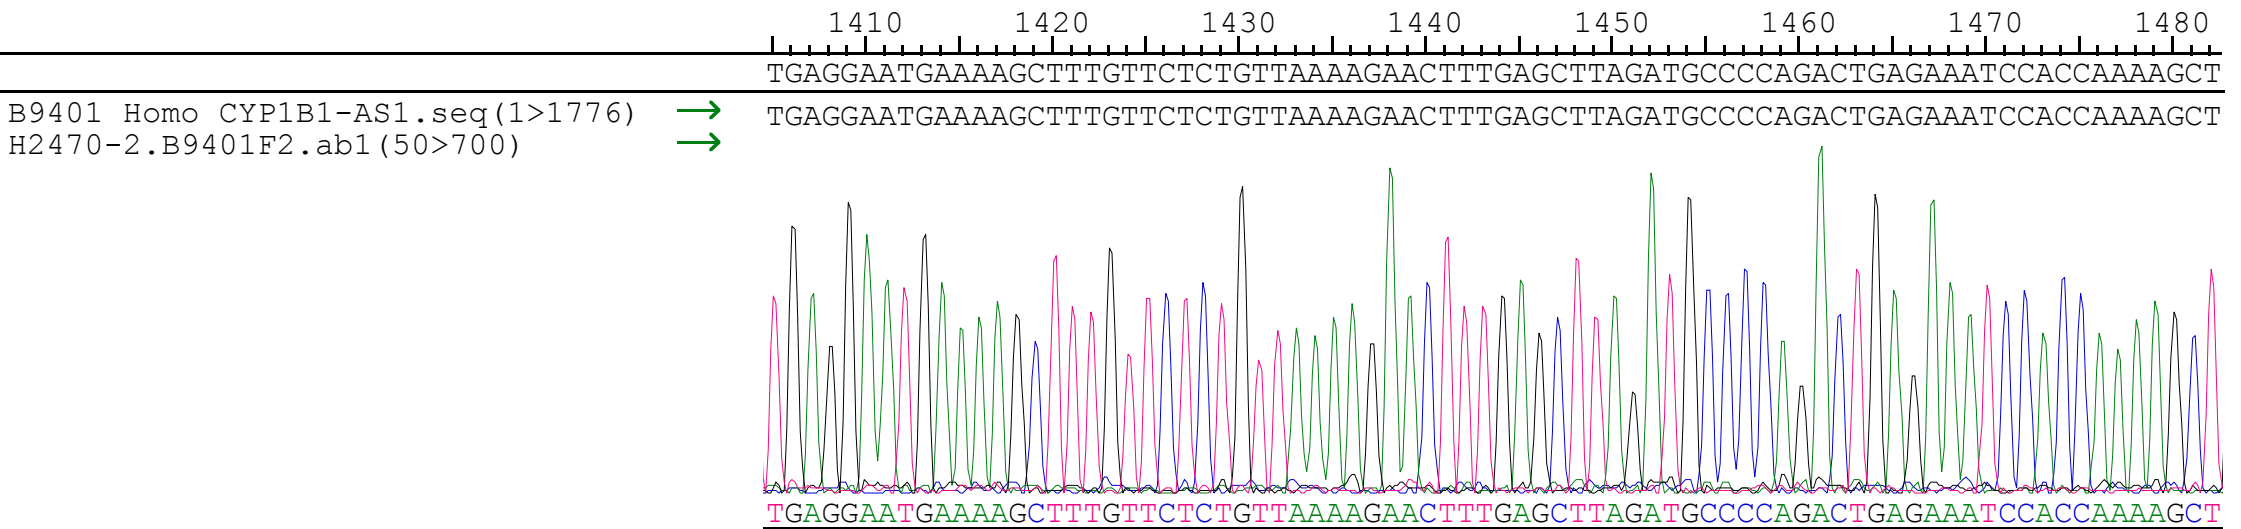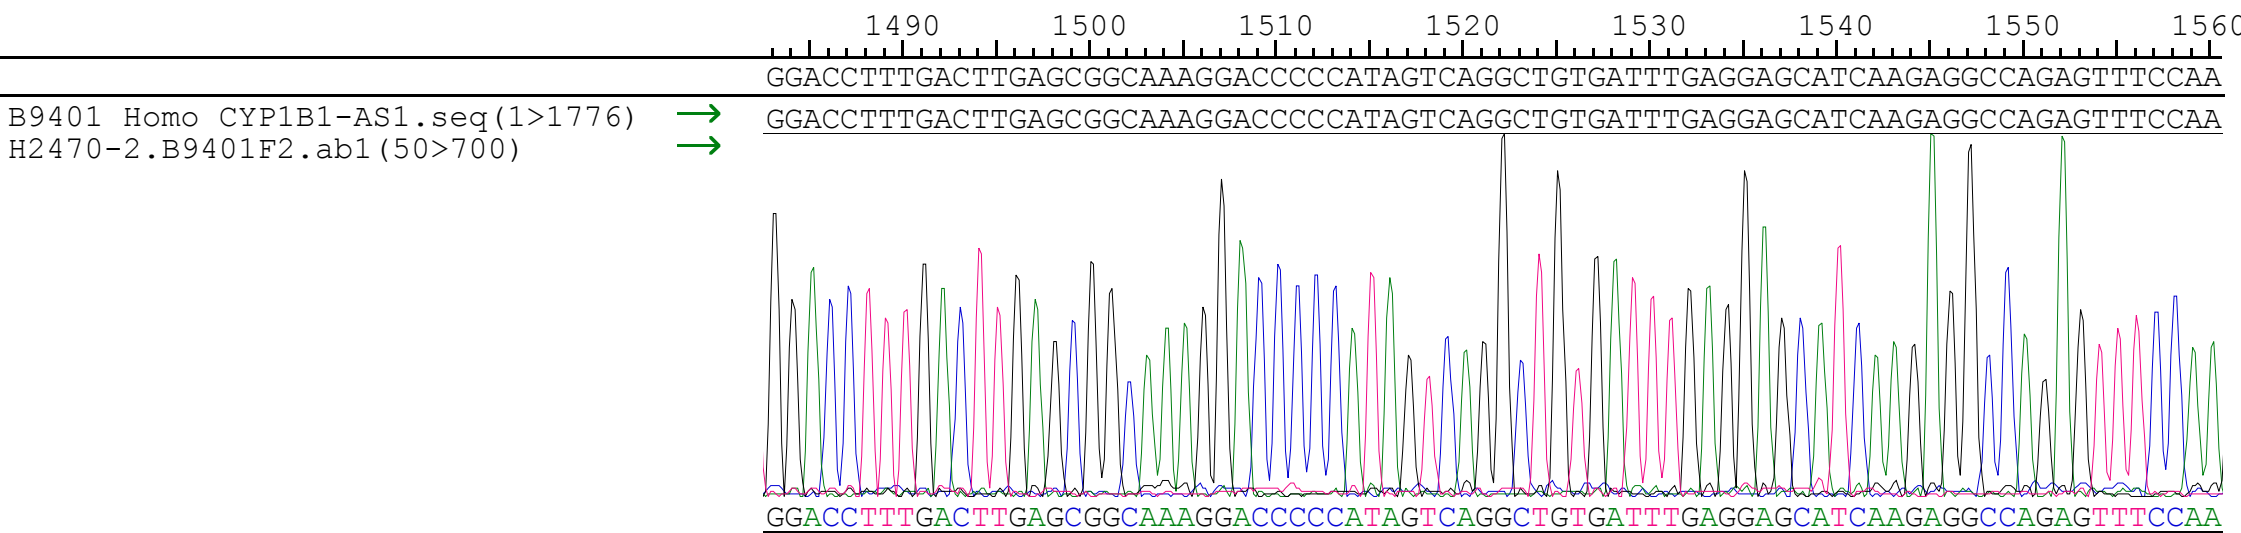

## Project: Alignment of Homo CYP1B1-AS1.sq Contig 1

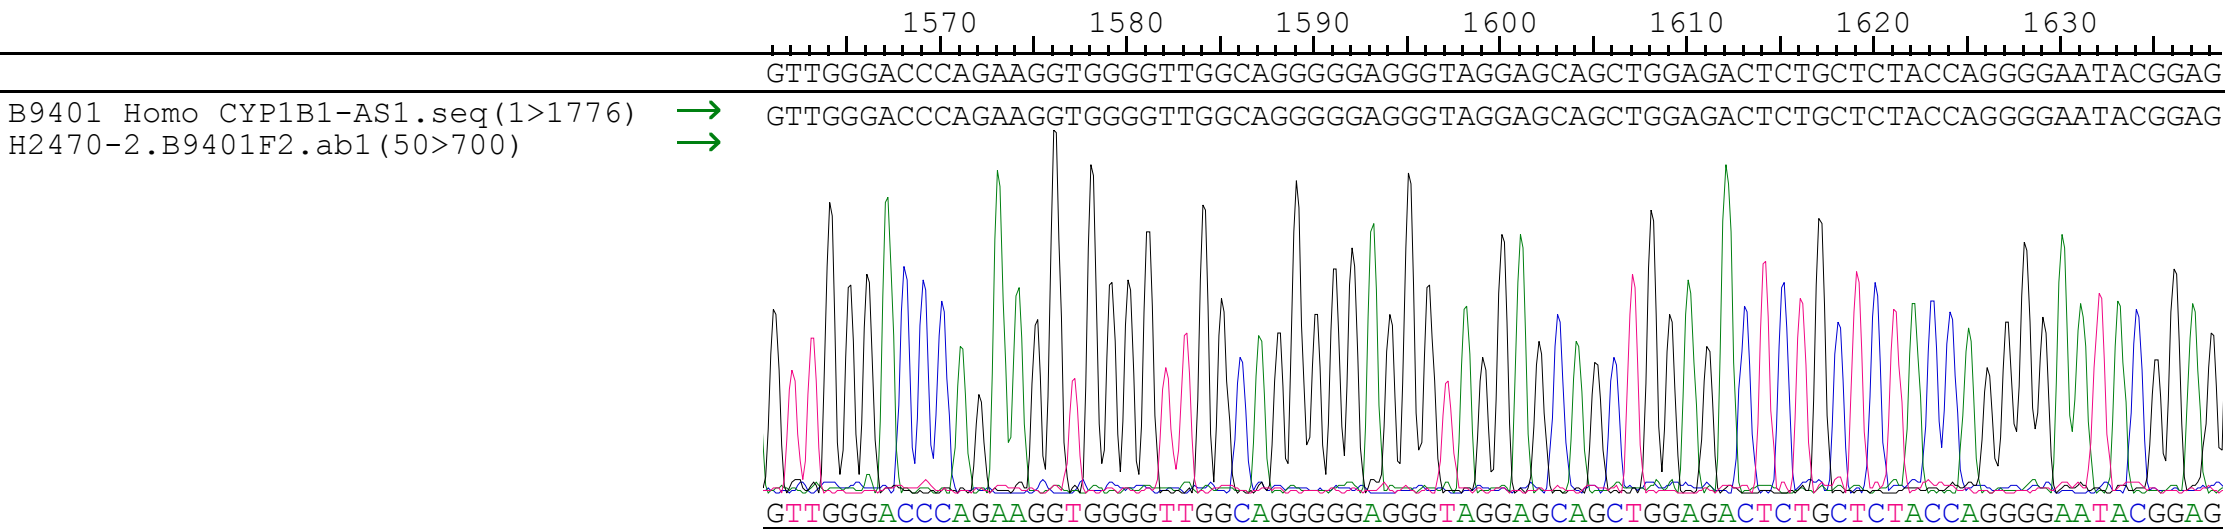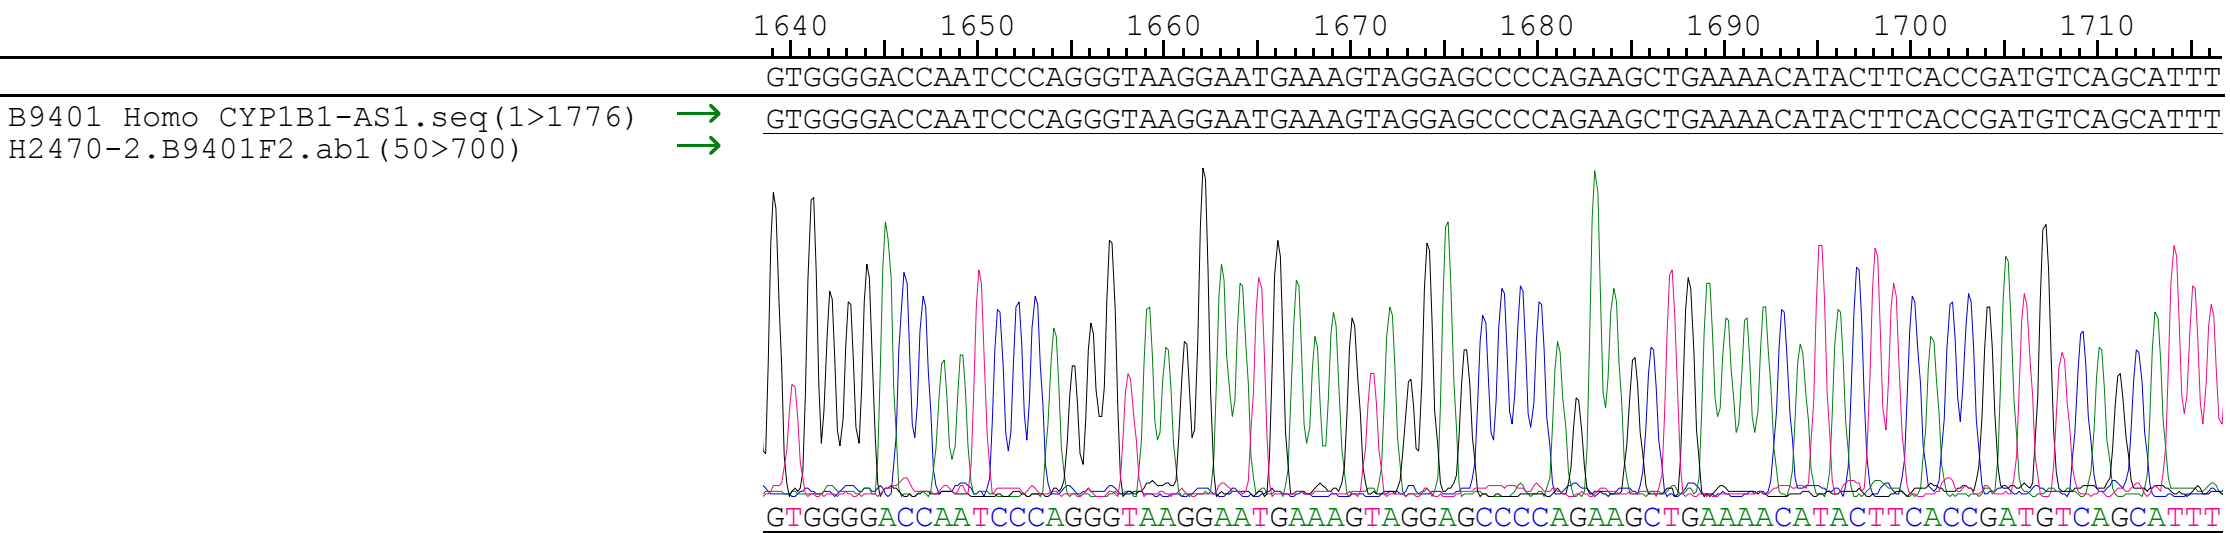

Project: Alignment of Homo CYP1B1-AS1.sq Contig 1

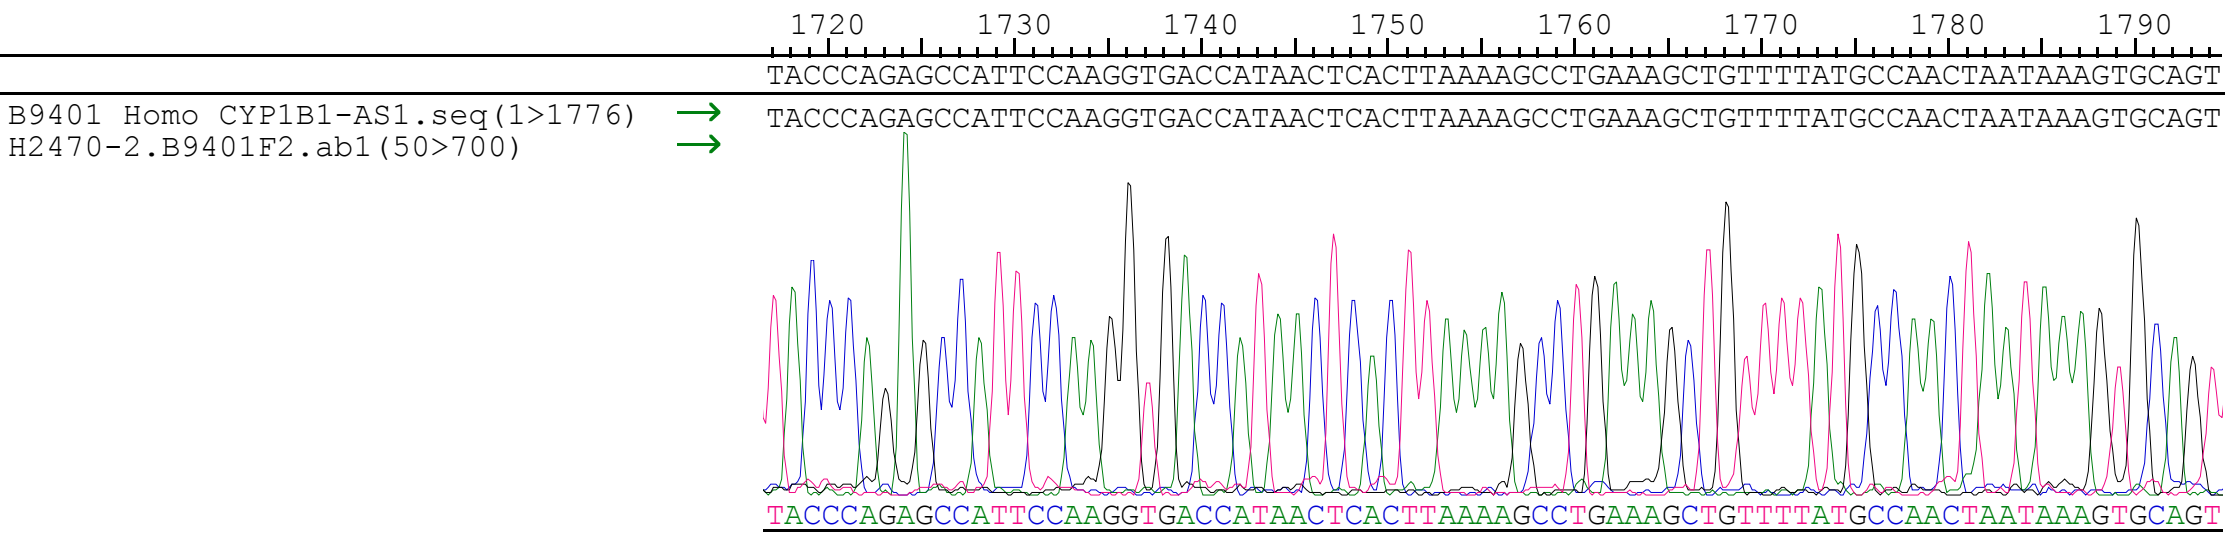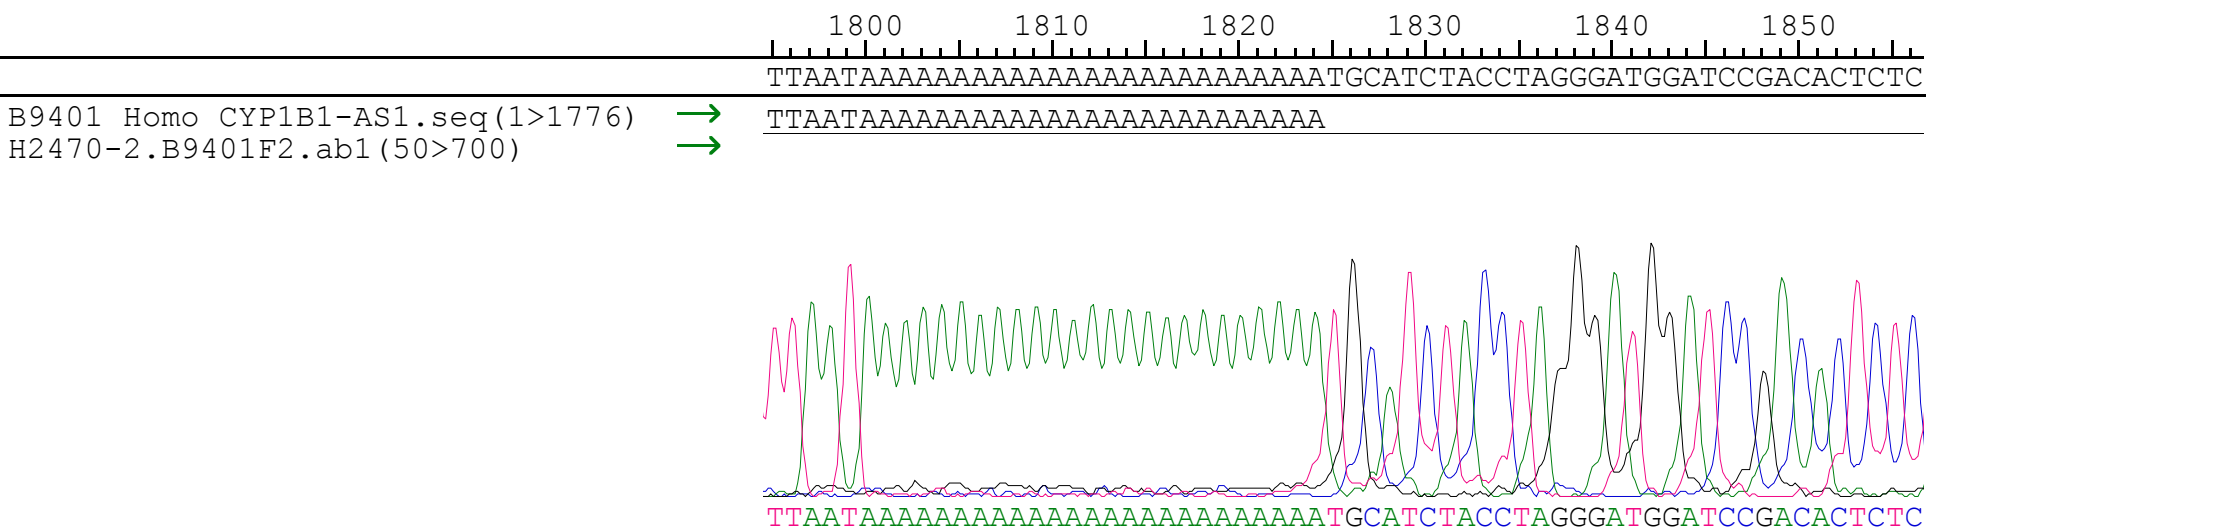

# Supplementary Data 2. FOXO1 expression vector sequence.

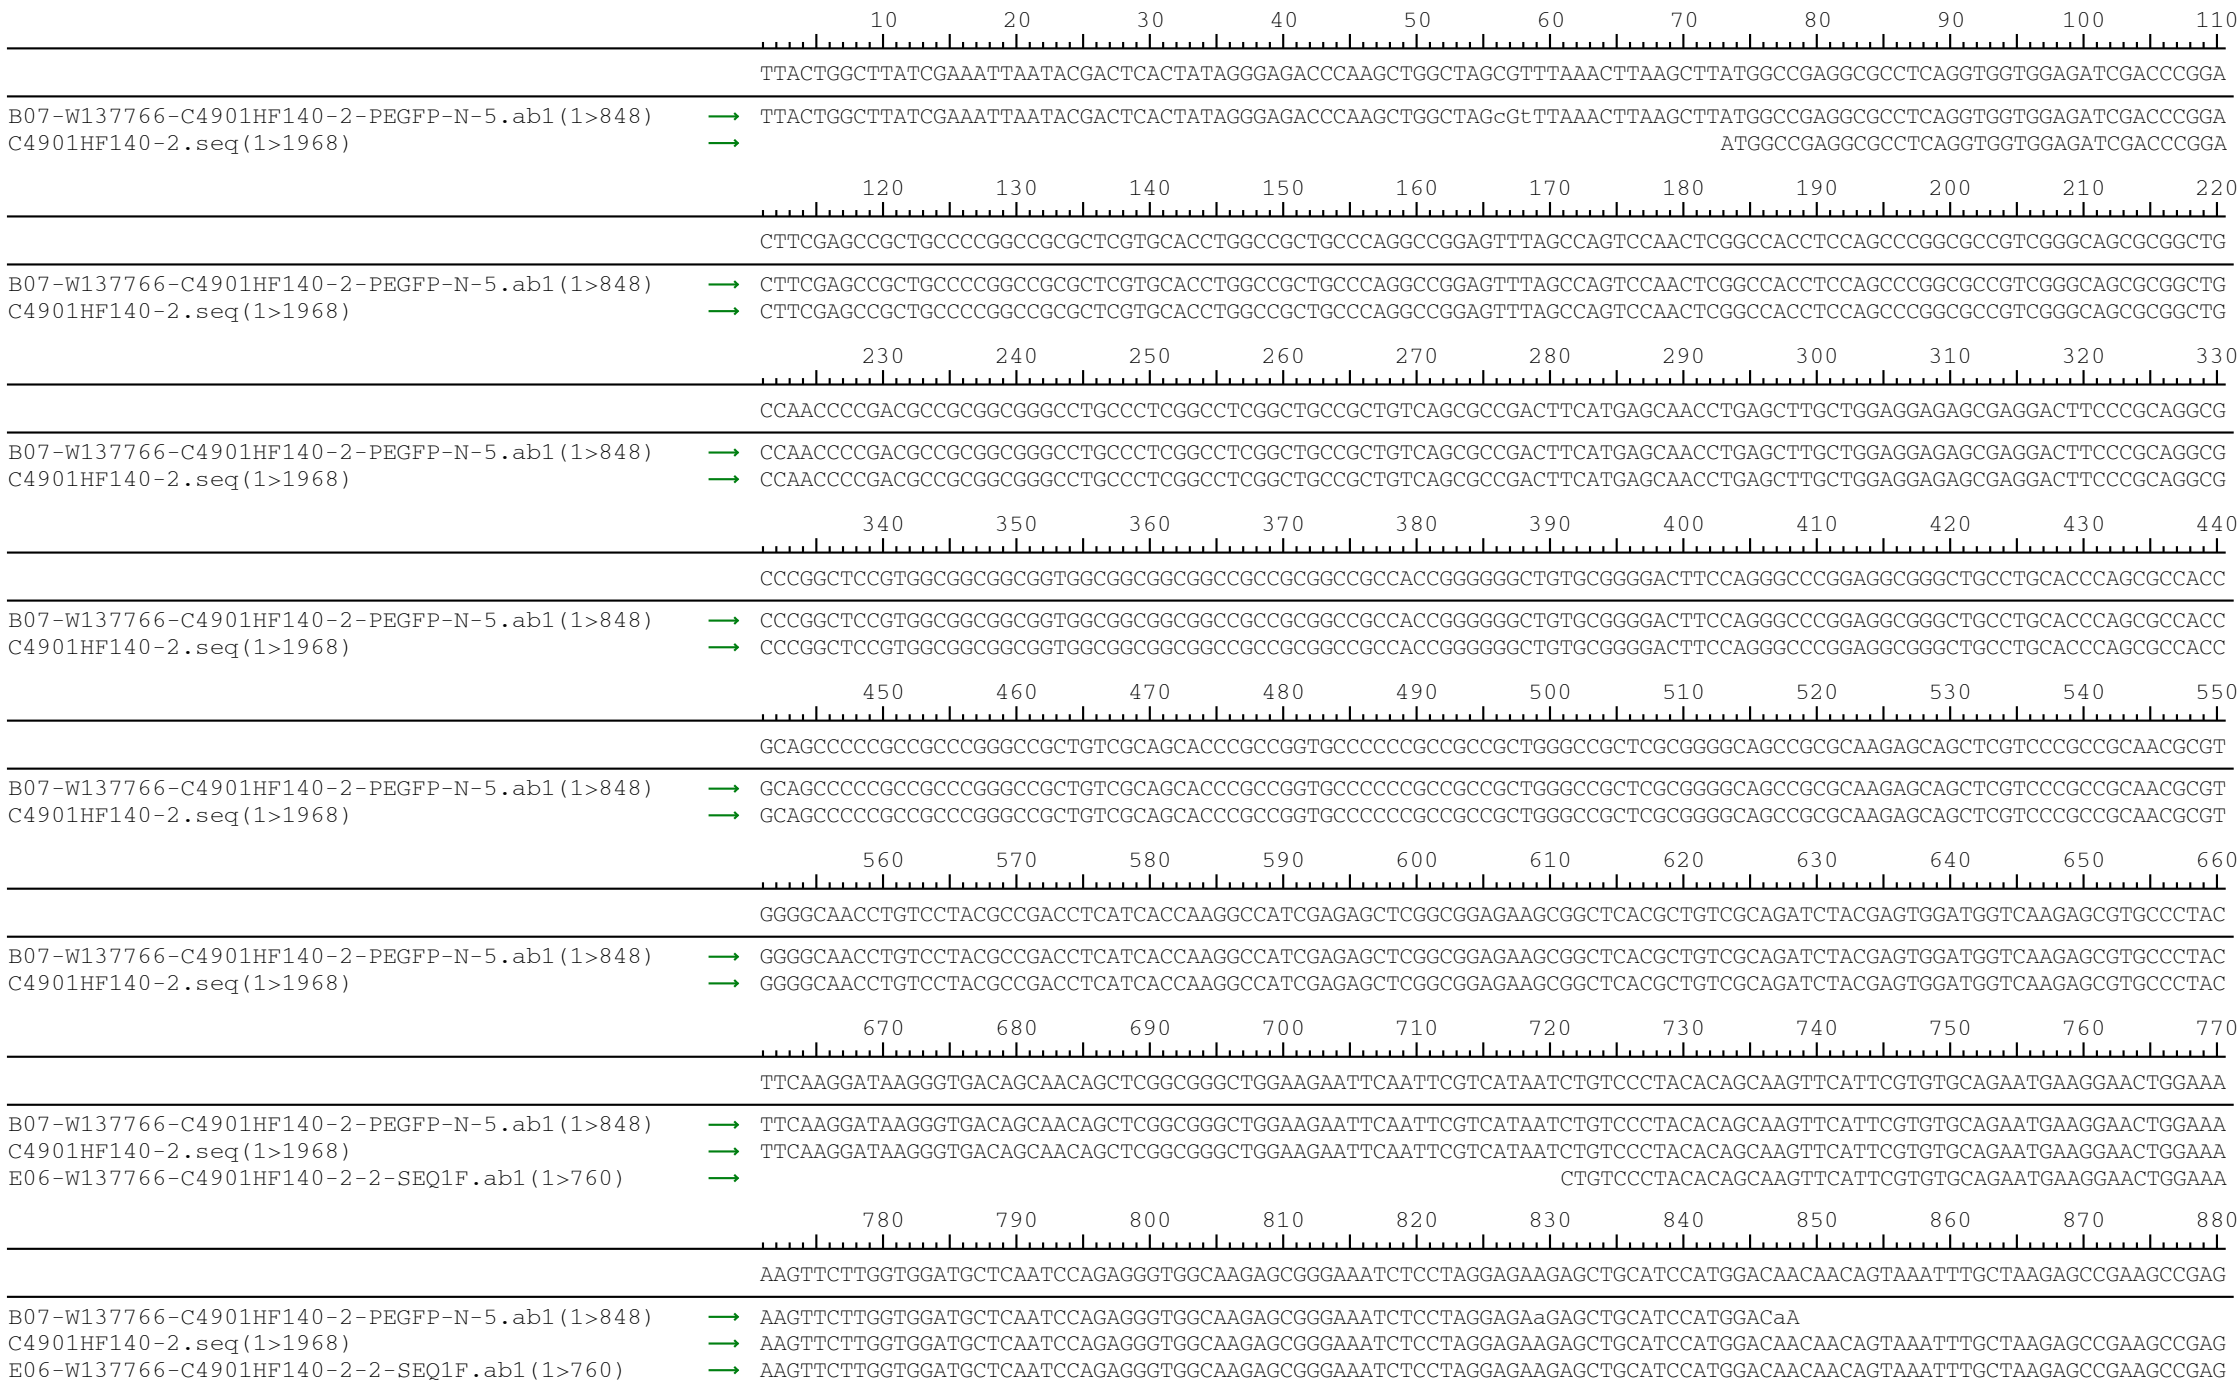

Project: C4901HF140-2.SQD Contig 1

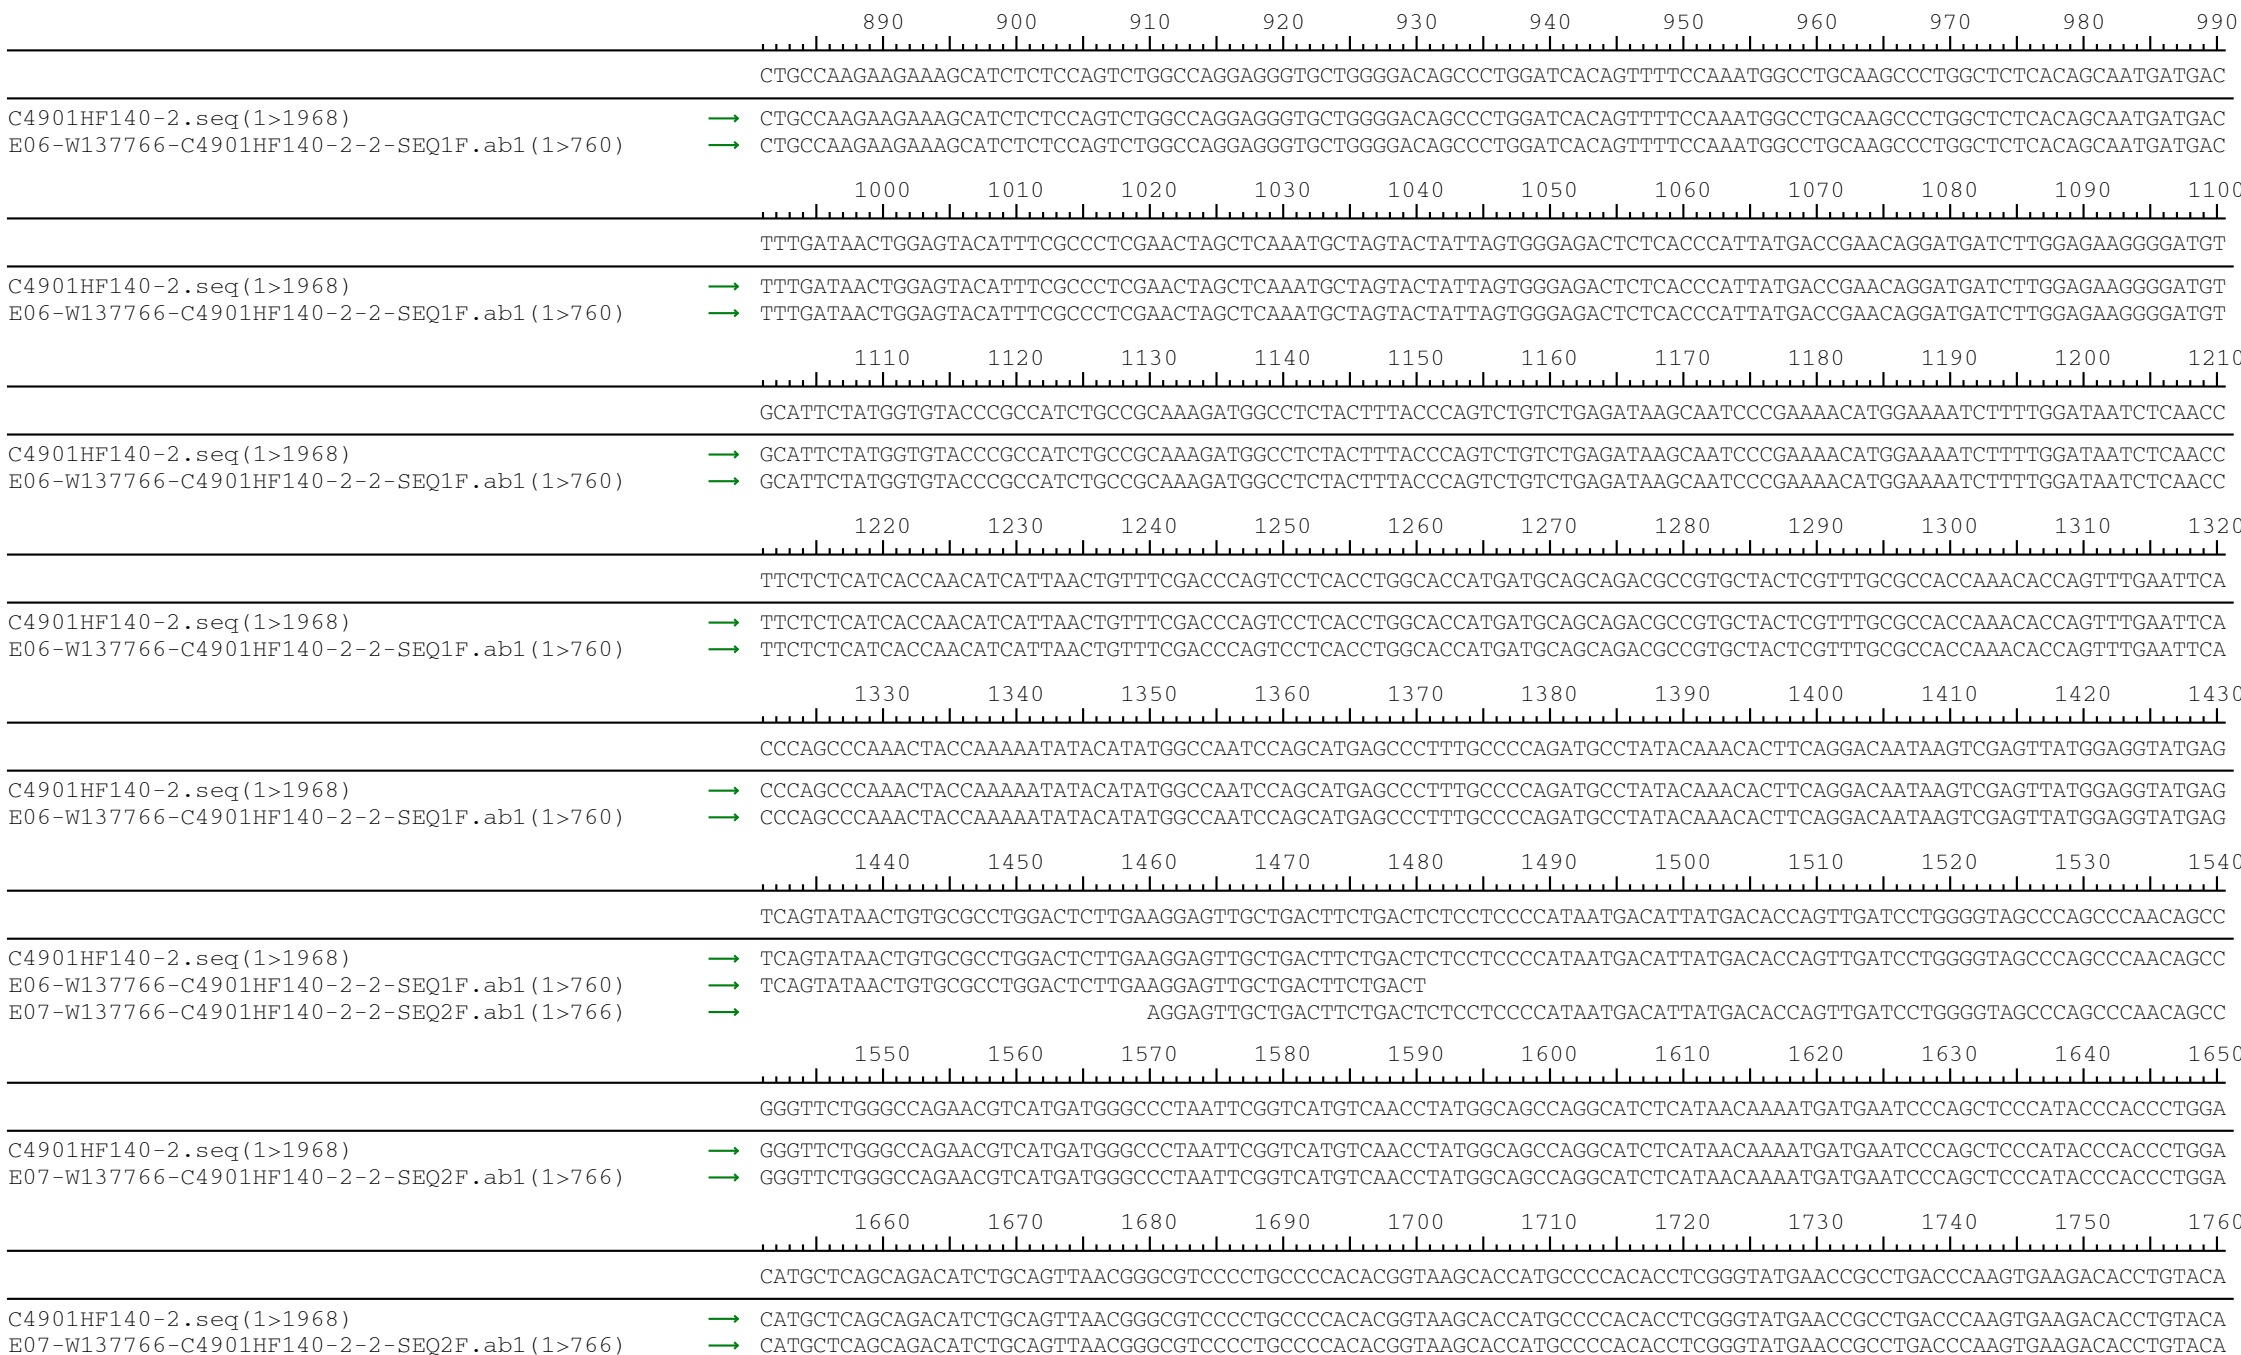

Project: C4901HF140-2.SQD Contig 1

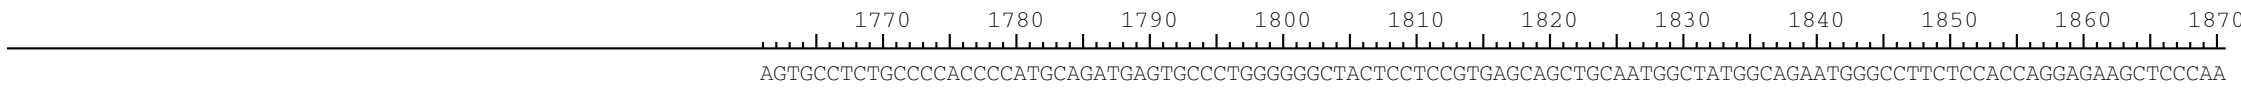

AGTGCCTCTGCCCCACCCCATGCAGATGAGTGCCTTGGGGGGCTACTCCTCCGTGAGCAGCTGCAATGGCTATGGCAGAATGGGCCTTCTCCACCAGGAGAAGCTCCCAA

C4901HF140-2.seq (1>1968) → AGTGCCTCTGCCCCACCCCATGCAGATGAGTGCCTTGGGGGGCTACTCCTCCGTGAGCAGCTGCAATGGCTATGGCAGAATGGGCCTTCTCCACCAGGAGAAGCTCCCAA  
 E07-W137766-C4901HF140-2-2-SEQ2F.ab1 (1>766) → AGTGCCTCTGCCCCACCCCATGCAGATGAGTGCCTTGGGGGGCTACTCCTCCGTGAGCAGCTGCAATGGCTATGGCAGAATGGGCCTTCTCCACCAGGAGAAGCTCCCAA

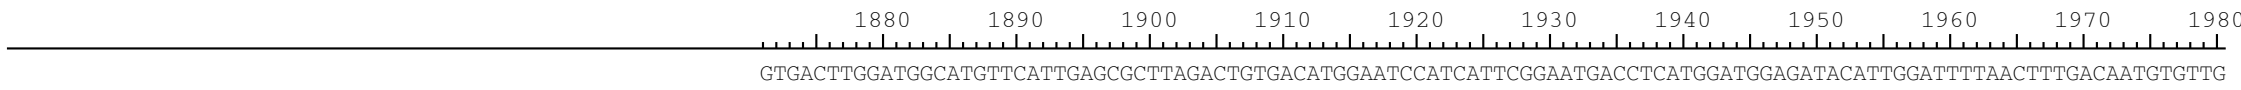

GTGACTTGGATGGCATGTTTCATTGAGCGCTTAGACTGTGACATGGAATCCATCATTCGGAATGACCTCATGGATGGAGATACATTGGATTTTAACTTTGACAATGTGTTG

C4901HF140-2.seq (1>1968) → GTGACTTGGATGGCATGTTTCATTGAGCGCTTAGACTGTGACATGGAATCCATCATTCGGAATGACCTCATGGATGGAGATACATTGGATTTTAACTTTGACAATGTGTTG  
 E07-W137766-C4901HF140-2-2-SEQ2F.ab1 (1>766) → GTGACTTGGATGGCATGTTTCATTGAGCGCTTAGACTGTGACATGGAATCCATCATTCGGAATGACCTCATGGATGGAGATACATTGGATTTTAACTTTGACAATGTGTTG

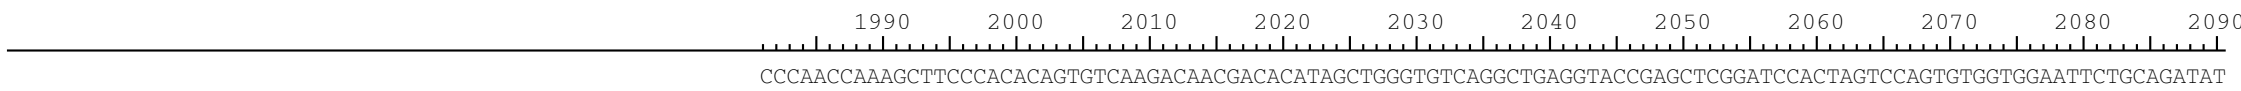

CCCAACCAAAGCTTCCCACACAGTGTCAAGACAACGACACATAGCTGGGTGTCAGGCTGAGGTACCGAGCTCGGATCCACTAGTCCAGTGTGGTGGAAATCTGCAGATAT

C4901HF140-2.seq (1>1968) → CCCAACCAAAGCTTCCCACACAGTGTCAAGACAACGACACATAGCTGGGTGTCAGGCTGAGGTACCGAGCTCGGATCCACTAGTCCAGTGTGGTGGAAATCTGCAGATAT  
 E07-W137766-C4901HF140-2-2-SEQ2F.ab1 (1>766) → CCCAACCAAAGCTTCCCACACAGTGTCAAGACAACGACACATAGCTGGGTGTCAGGCTGAGGTACCGAGCTCGGATCCACTAGTCCAGTGTGGTGGAAATCTGCAGATAT

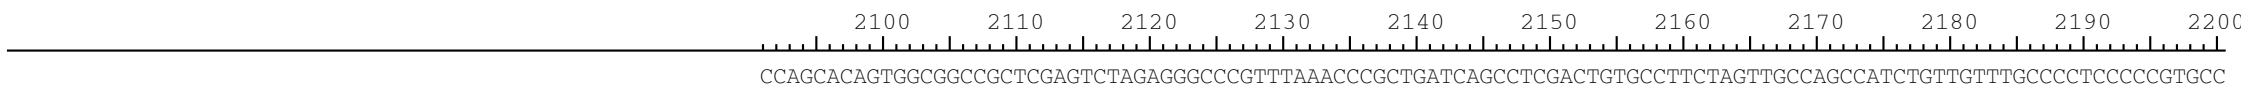

CCAGCACAGTGGCGGCCGCTCGAGTCTAGAGGGCCCGTTTAAACCCGCTGATCAGCCTCGACTGTGCCTTCTAGTTGCCAGCCATCTGTTGTTTGCCCCCTCCCCCGTGCC

E07-W137766-C4901HF140-2-2-SEQ2F.ab1 (1>766) → CCAGCACAGTGGCGGCCGCTCGAGTCTAGAGGGCCCGTTTAAACCCGCTGATCAGCCTCGACTGTGCCTTCTAGTTGCCAGCCATCTGTTGTTTGCCCCCTCCCCCGTGCC

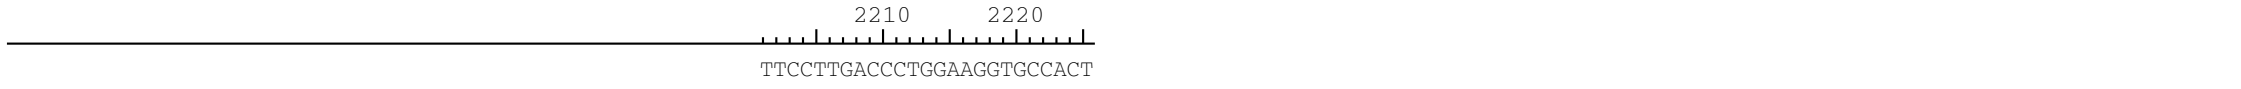

TTCCTTGACCCTGGAAGGTGCCACT

E07-W137766-C4901HF140-2-2-SEQ2F.ab1 (1>766) → TTCCTTGACCCTGGAAGGTGCCACT

# Supplementary Fig.1 Expression characteristics of CYP1B1-AS1.

**a**

## Protein coding potential

LNCipedia  
version 5.2

| Metric                           | Raw result | Interpretation |
|----------------------------------|------------|----------------|
| PRIDE reprocessing 2.0           | 0          | non-coding     |
| Lee translation initiation sites | 0          | non-coding     |
| PhyloCSF score                   | -77.3697   | non-coding     |
| CPAT coding probability          | 16.57%     | non-coding     |
| Bazzini small ORFs               | 0          | non-coding     |

**b**

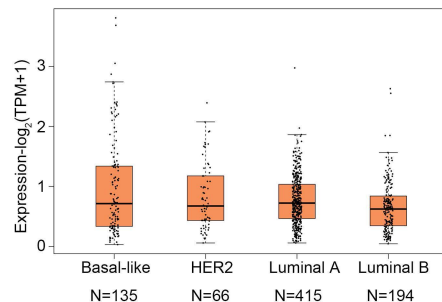

**c**

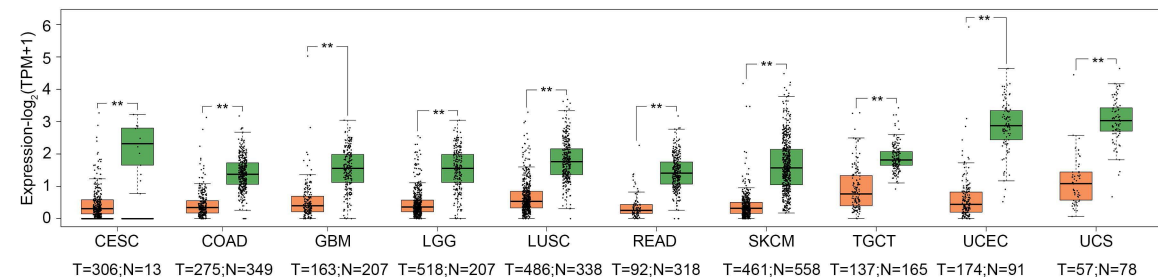

(a) The LNCipedia database shows the coding capacity and conserved features of CYP1B1-AS1. (b) TCGA data were used to analyze the expression of CYP1B1-AS1 across molecular subtypes of breast cancer. (c) TCGA data show that CYP1B1-AS1 is downregulated in various cancers. CESC, cervical and endocervical cancers. COAD, colon adenocarcinoma. GBM, Glioblastoma multiforme. LGG, brain lower grade glioma. LUSC, lung squamous cell carcinoma. READ, rectum adenocarcinoma. SKCM, skin cutaneous melanoma. TGTC, testicular germ cell tumor. UCEC, uterine corpus endometrial carcinoma. UCS, uterine carcinosarcoma. \*\* $P < 0.01$ .

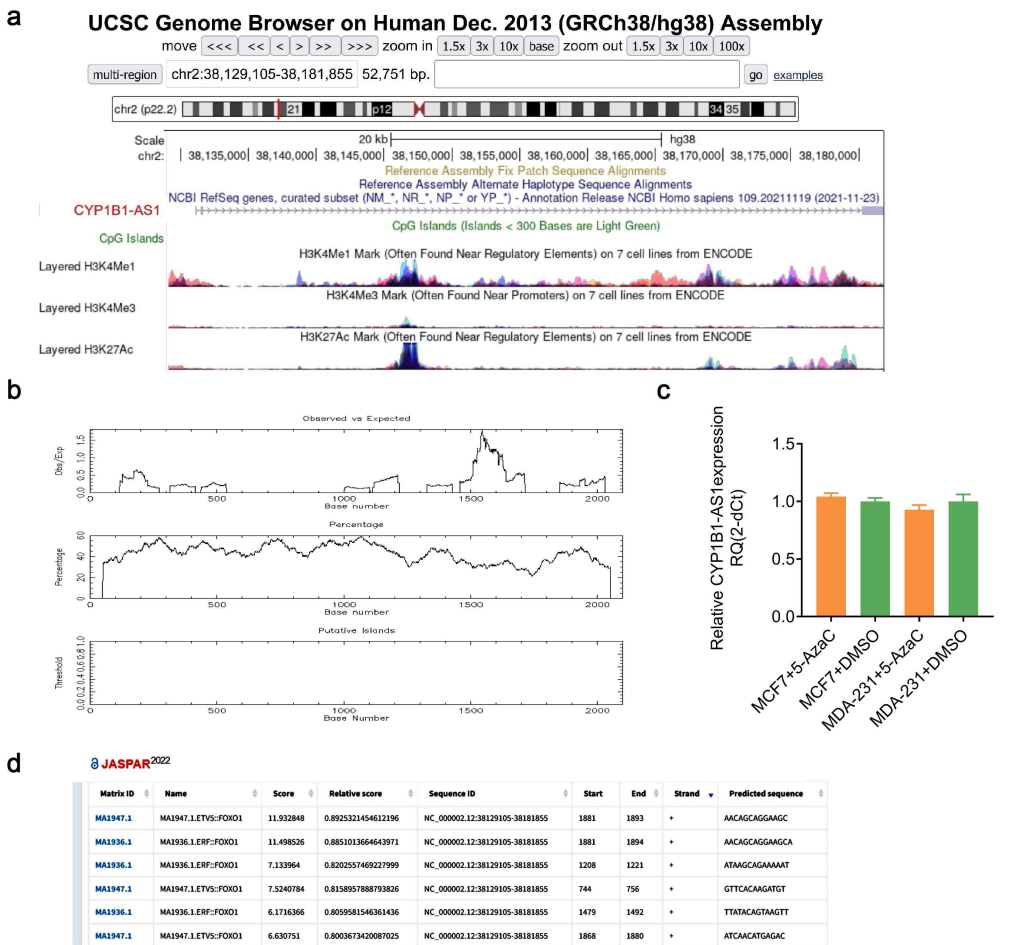

(a) Characterization of CYP1B1-AS1 gene and its promoter region provided by UCSC Genome Browser. (b) Methylation of the CYP1B1-AS1 promoter region predicted by EBI CpGPlot. (c) qPCR was used to detect changes in CYP1B1-AS1 after treatment of MCF7 and MDA-MB-231 cells with the demethylating drug 5-Azacytidine. 5-Azac, 5-Azacytidine. Solvent DMSO as blank control. Experiments were performed at least 3 times. Data are presented as mean  $\pm$  SEM and analyzed with a two-tailed *T* test. (d) JASPAR was used to analyze the binding sites of the transcription factor FOXO1 to the CYP1B1-AS1 promoter region.



Supplementary Fig.3 The results of the co-immunoprecipitation assay.

a

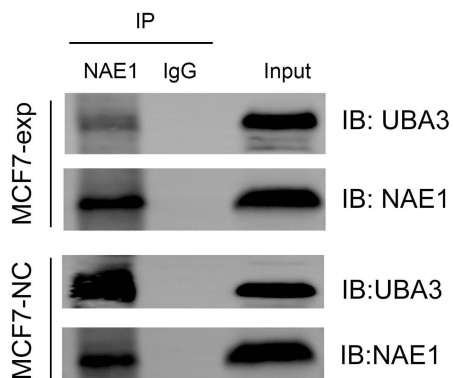

b

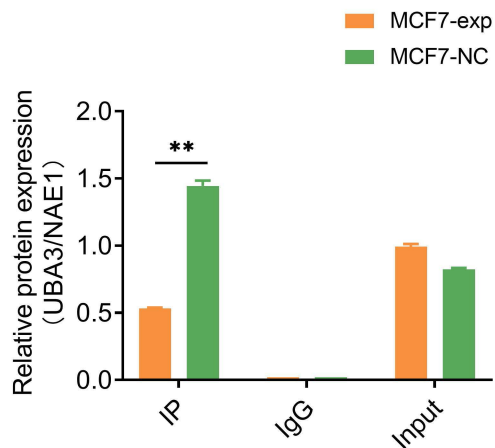

c

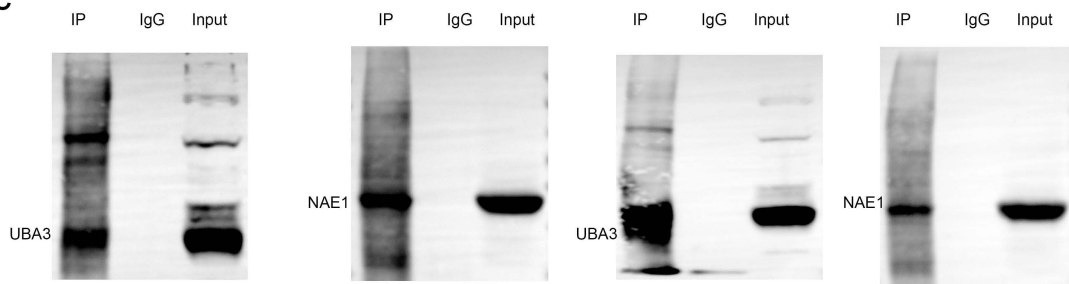

(a,b) Co-immunoprecipitation experiments were used to analyze changes in the amount of UBA3 protein bound to NAE1 in MCF7 cells after CYP1B1-AS1 upregulation.

\*\* $P < 0.01$ . (c) Raw Western blot data from co-immunoprecipitation experiments.

Supplementary Fig.4 Raw data of Western blot.

Fig.2f

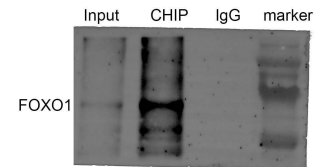

Fig.2i

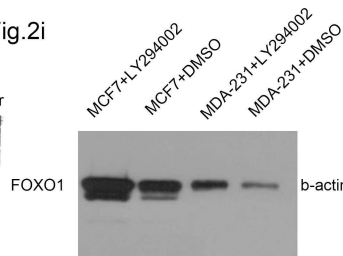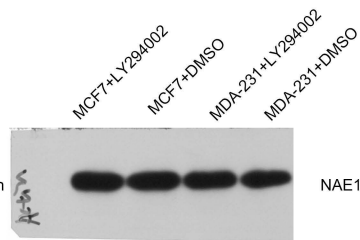

Fig.5e

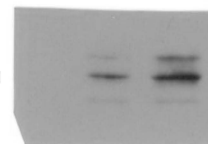

Fig.6a

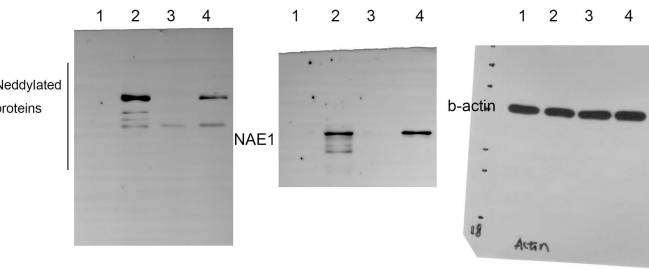

Fig.6c

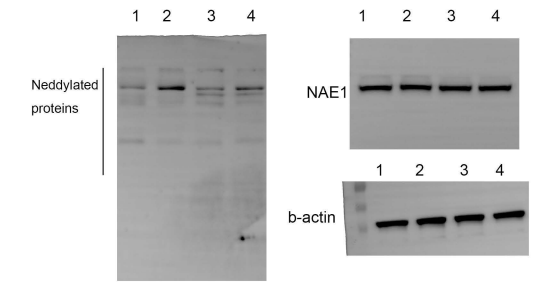

Fig.6g

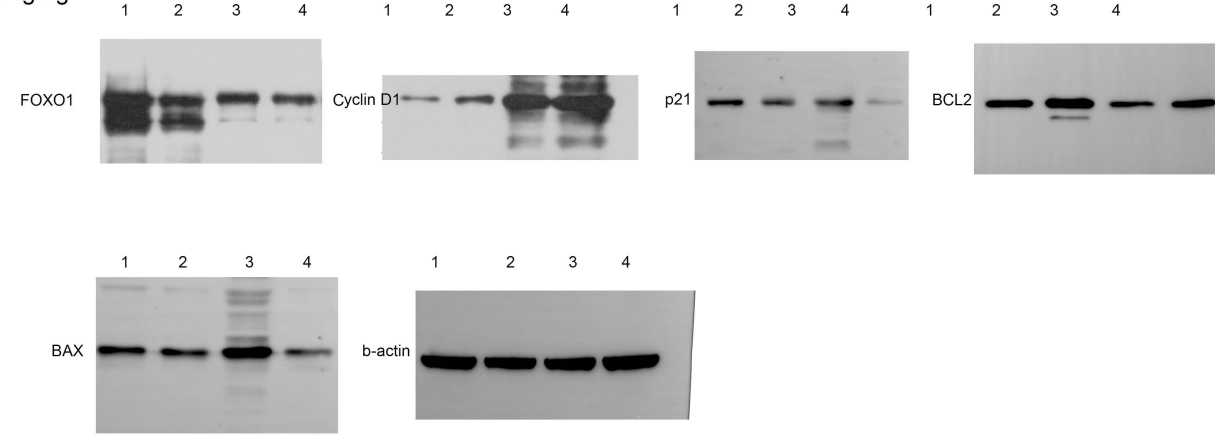

1, MCF7-exp; 2, MCF7-NC; 3, MDA-231-exp; 4, MDA-231-NC.
